1 **Obesity-induced gut microbiota dysbiosis can be ameliorated**  
2 **by fecal microbiota transplantation: a multiomics approach.**

3

4 Maria Guirro<sup>1,2</sup>, Andrea Costa<sup>2</sup>, Andreu Gual-Grau<sup>1</sup>, Pol Herrero<sup>2</sup>, Helena Torrell<sup>2</sup>, Núria  
5 Canela<sup>2</sup> and Lluís Arola<sup>1,3</sup>

6

7 <sup>1</sup> Universitat Rovira i Virgili, Biochemistry and Biotechnology Department, Nutrigenomics  
8 Research Group, Tarragona, Spain

9 <sup>2</sup> Eurecat, Centre Tecnològic de Catalunya. Centre for Omic Sciences (COS), Joint Unit  
10 Universitat Rovira i Virgili-EURECAT. Unique Scientific and Technical Infrastructures  
11 (ICTS), Reus, Spain

12 <sup>3</sup> Eurecat, Centre Tecnològic de Catalunya. Biotechnological Area, Reus, Spain

13

14

15 **Corresponding author**

16 **E-mail: [nuria.canela@eurecat.org](mailto:nuria.canela@eurecat.org)**

## 18 **Abstract**

19 Obesity and its comorbidities are currently considered an epidemic, and the involved  
20 pathophysiology is well studied. Recently, the gut microbiota has emerged as a new potential  
21 therapeutic target for the treatment of obesity. Diet and antibiotics are known to play crucial  
22 roles in changes in the microbiota ecosystem and the disruption of its balance; therefore, the  
23 manipulation of gut microbiota may represent a strategy for obesity treatment. Fecal microbiota  
24 transplantation, during which fecal microbiota from a healthy donor is transplanted to an obese  
25 subject, has aroused interest as an effective approach for the treatment of obesity. To determine  
26 its success, a multiomics approach was used that combined metagenomics and metaproteomics  
27 to study microbiota composition and function.

28 To do this, a study was performed in rats that evaluated the effect of a hypercaloric diet on the  
29 gut microbiota, and this was combined with antibiotic treatment to deplete the microbiota before  
30 fecal microbiota transplantation to verify its effects on gut microbiota-host homeostasis. Our  
31 results showed that a high-fat diet induces changes in microbiota biodiversity and alters its  
32 function in the host. Moreover, we found that antibiotics depleted the microbiota enough to  
33 reduce its bacterial content. Finally, we assessed the use of fecal microbiota transplantation as  
34 an obesity therapy, and we found that it reversed the effects of antibiotics and reestablished the  
35 microbiota balance, which restored normal functioning and alleviated microbiota disruption.

## 37        **Introduction**

38        Obesity is defined as a disequilibrium in energy balance and is currently a global health problem  
39        in Western societies, where its prevalence has increased considerably in recent years. Obesity  
40        triggers a vast number of comorbidities associated with hypertension, cardiovascular disease,  
41        and diabetes, as well as other conditions [1]. It is widely known that obesity is affected by  
42        numerous factors, such as diet, lifestyle and genetic background [2], and recently it has been  
43        shown to be related to gut microbiota [3], which have been implicated in energy homeostasis  
44        and metabolic functions [4]. Moreover, the same factors that affect obesity can modulate gut  
45        microbiota composition, and the function of the gut microbiota will be affected by factors  
46        involved in gut microbiota-host equilibrium [5].

47        Several diet-induced animal models of obesity can be used to explore the mechanisms involved  
48        in obesity. There are different obesogenic diets that can be employed. One example of these  
49        diets is the semi-purified high-fat diet [6,7]. These types of diets are more commonly used in  
50        these models due to their well-defined nutritional composition [8–10].

51        Alterations in the gut microbiota composition have been shown to result in an imbalance that  
52        leads to dysbiosis, which likely will have dramatic effects on the maintenance of health [11].

53        Fecal microbiota transplantation (FMT) is a new and straightforward therapy that manipulates  
54        the gut microbiota by transferring healthy donor microbiota into an existing disrupted gut  
55        microbial ecosystem. This therapy can be an effective approach to obesity treatment [12,13].

56        Even though FMT has some limitations, several studies have tested its effectiveness and have  
57        demonstrated an improvement of some comorbidities associated not only with obesity [14] but  
58        also with other noncommunicable diseases [15–18].

59        Animal models have been increasingly employed to investigate the role and function of gut  
60        microbiota, and there have been several studies where mice that were fed a high-fat diet showed  
61        a clear disruption in their microbiota composition [19,20]. Such changes in the microbiota due  
62        to diet can modulate important metabolic functions, including fat storage [21]. Among the

63 different animal models available, germ-free (GF) mice represent the model that is most used to  
64 study the interaction between hosts and their microbiota, and it is also the preferred option for  
65 FMT studies. However, GF mice have less body fat in comparison with wild-type mice, even if  
66 they consume more food [22,23], and as a result, they are not the most realistic model for  
67 obesity-induced studies. In addition, these animals must be bred in sterile environments, and  
68 conducting these kinds of experiments requires skilled personnel and a special infrastructure.  
69 Thus, gut microbiota depletion by using a cocktail with a combination of broad-spectrum  
70 antibiotics [24] is an accessible alternative to the use of GF mice to study the role of microbiota  
71 in the host [18].

72 Nonetheless, the effect of FMT on hosts has hardly been studied due to its novelty, and specific  
73 tools are needed to comprehend these effects. Recently, multiomics approaches have been  
74 proposed as the most accurate methods for the study of the complexity of the gut microbiota and  
75 its environment [4,21,25]. Metagenomics, which provides a taxonomical profile of the  
76 biodiversity present in each experimental condition, and metaproteomics, which is focused on  
77 the characterization of the whole proteome to reveal its functionality in the host [5,26,27], are  
78 the most promising omics strategies that could be used to reveal the role of gut microbiota.

79 Hence, the aims of this study were to investigate the role of the gut microbiota with a multiomic  
80 approach that combined metagenomics and metaproteomics to determine the effects of a dietary  
81 intervention consisting of two different diets (a low-fat diet (LFD) and a high-fat diet (HFD)), to  
82 assess the effects of antibiotics on gut microbiota depletion and to corroborate the effectiveness  
83 of FMT in rats fed a HFD.

84

## 85 **Materials and methods**

### 86 **Animals**

87 Forty eight-week-old male Wistar rats (Charles River Laboratories, Massachusetts, USA) were  
88 housed individually at 22°C with a light/dark cycle of 12 hours and were given access to food

89 and water *ad libitum* during the experiment. After one week of adaptation, the animals were  
90 divided into five groups (n=8). For 9 weeks, two groups were fed a LFD (10% fat, 70%  
91 carbohydrate, and 20% protein; D12450K, Research Diets, New Brunswick, USA) or a HFD  
92 (45% fat, 35% carbohydrate, and 20% protein; D12451, Research Diets, New Brunswick,  
93 USA). Two other groups were also fed either a LFD or a HFD for 11 weeks, and during the last  
94 2 weeks, they were given antibiotic treatment (ABS). The last group was fed a HFD for 14  
95 weeks; at 10 and 11 weeks the rats received antibiotic treatment, and during the last three weeks  
96 (12-14), they received FMTs from the LFD group (Fig 1).

97

98 **Fig 1. Schematic representation of the experimental design.** LFD, Low-Fat Diet; HFD,  
99 High-Fat Diet; ABS, Antibiotics; FMT, Fecal Microbiota Transplantation.

100

101 Body weight and food intake were measured weekly throughout the study. The body fat mass  
102 was determined on weeks 1, 9, 11 and 14 by nuclear magnetic resonance (NMR) using an  
103 EchoMRI-700™ device (Echo Medical Systems, L.L.C., Houston, USA).

104 Cecal samples were obtained immediately after the animals were sacrificed and were frozen in  
105 liquid nitrogen and stored at -80°C until the analyses were performed.

106 The Animal Ethics Committee of the University of Rovira i Virgili (Tarragona, Spain) approved  
107 all procedures.

## 108 **Antibiotic treatment and Fecal Microbiota Transplants.**

109 ABS was started 9 weeks after being fed either diet, and the cocktail of antibiotics used  
110 consisted of 0.5 g/L vancomycin (Sigma-Aldrich, UK) and 1 g/L neomycin, metronidazole and  
111 ampicillin (Sigma-Aldrich, UK). The water flasks were supplemented with the antibiotic  
112 cocktail. The mixture was freshly prepared every day, and the animals were given free access to  
113 it.

114 The FMTs were performed for 3 weeks; cecal content from LFD-fed rats was administered by  
115 oral gavage for four consecutive days during the first week, two alternating days during week 2

116 and three days before the rats were sacrificed. Omeprazole (20 mg/kg) was administered by oral  
117 gavage 4 hours before each FMT.

## 118 **Metagenomics analysis**

### 119 **DNA extraction and 16S rRNA gene amplification and purification**

120 DNA was extracted from 300 mg cecal samples using a QIAamp DNA Stool Mini Kit (Qiagen  
121 Inc., Hilden, Germany) according to the manufacturer's instructions. The DNA purity and  
122 integrity were assessed using spectrophotometry (NanoDrop, Thermo Fisher Scientific,  
123 Massachusetts, USA).

124 Two variable regions (V3 and V4) in the 16S rRNA gene were amplified by PCR as described  
125 previously [21].

### 126 **Ion Torrent sequencing and taxonomic assignments**

127 A multiplexed mixture of twenty DNA samples was diluted to a concentration of 60 pM prior to  
128 clonal amplification. The Ion 520 & Ion 530 Kit-Chef (Life Technologies, California, USA)  
129 was employed for template preparation and sequencing according to the manufacturer's  
130 instructions. The prepared samples were loaded on an Ion 530 chip and sequenced using the Ion  
131 S5 system (Life Technologies, California, USA).

132 After sequencing, the Ion Torrent Suite software package was used to remove the low-quality  
133 and polyclonal sequences, and the remaining reads were then analyzed using QIIME [28]. The  
134 analysis included OTU (operational taxonomic unit) clustering, alpha diversity analysis, OTU  
135 analysis and species annotation (OTU table), and beta diversity analysis. The OTU table, which  
136 indicates the number of reads per sample per OTU, was used for the subsequent statistical  
137 analysis.

## 138 **Metaproteomics analysis**

139 The metaproteomics methodology was conducted as described previously [21,29] with minor  
140 modifications.

## 141 **Cell lysis and protein digestion**

142 Briefly, 300 mg of stool sample was subjected to differential centrifugation to collect the  
143 microbial cells, and the obtained bacterial pellet was suspended in SDS-extraction buffer (2%  
144 SDS, 100 mM DTT, and 20 mM Tris-HCl pH 8.8), incubated at 95°C and subjected to a bead  
145 beating process (Bullet Blender, Cultiex, Barcelona, Spain) combined with freeze-thawing  
146 cycles. The proteins were purified by TCA/acetone precipitation, and 75 µg of protein from  
147 each sample was reduced and alkylated, loaded onto a polyacrylamide gel and digested  
148 overnight at 37°C with trypsin (Promega, Wisconsin, USA) at an enzyme-to-protein ratio of  
149 1:100.

### 150 **Peptide TMT 10plex labeling**

151 The digested proteins were desalted with an HLB SPE column before labeling with TMT  
152 10plex reagent (Thermo Fisher Scientific, Massachusetts, USA) according to the manufacturer's  
153 instructions. To normalize the samples and the TMT batches, all samples were pooled and  
154 labeled with a 126-tag, and the pooled sample was included in each batch. Then, the labeled  
155 peptides from each sample were mixed together and desalted again with an HLB SPE column.

### 156 **Peptide fractionation**

157 The pooled samples were fractionated by isoelectric focusing with an Off-Gel Fractionator  
158 (OG) (Agilent Technologies, California, USA) and 24-well IPG strips (with a nonlinear gradient  
159 from pH 3 to pH 10) according to the manufacturer's protocol. After fractionation, each of the  
160 24 fractions was desalted again with an HLB column (Waters, Massachusetts, USA) prior to  
161 nanoLC-Orbitrap MS/MS analysis.

### 162 **nanoLC-Orbitrap MS/MS analysis.**

163 The 72 fractions obtained from the OG fractionation (3 TMT x 24 fractions) were loaded on a  
164 trap nanocolumn (0.01 x 2 cm, 5 µm; Thermo Fisher Scientific, Massachusetts, USA) and  
165 separated with a C-18 reversed-phase (RP) nanocolumn (0.0075 x 12 cm 3 µm; Nikkyo Technos  
166 Co. LTD, Japan). The chromatographic separation was performed with a 90-min gradient that  
167 used Milli-Q water (0.1% FA) and ACN (0.1% FA) as the mobile phase at a rate of 300 nl/min.

168 Mass spectrometry analyses were performed on a LTQ-Orbitrap Velos Pro (Thermo Fisher  
169 Scientific, Massachusetts, USA) by acquiring an enhanced FT-resolution spectrum (R=30,000  
170 FHMW) followed by the data-dependent FT-MS/MS scan events (FT-(HCD)MS/MS  
171 (R=15,000 FHMW at 35% NCE) from the ten most intense parent ions with a charge state  
172 rejection of one and a dynamic exclusion of 0.5 min.

173 The 24 raw data files for each TMT-plex were analyzed by multidimensional protein  
174 identification technology (MudPIT) using Proteome Discoverer software v.1.4.0.288 (Thermo  
175 Fisher Scientific, Massachusetts, USA). For protein identification, all MS and MS/MS spectra  
176 were analyzed using the Mascot search engine (version 2.5), which was set up to search two  
177 different SwissProt databases based on (i) *Rattus norvegicus* (8,003 sequences) and (ii) an in-  
178 house metagenomics database created from metagenomics results at the family level using the  
179 Uniref100 sequence identity to reduce the database size and avoid false positive findings  
180 (23,768,352 sequences). Two missed cleavage sites were allowed by assuming trypsin was used  
181 for digestion, and an error of 0.02 Da for the FT-MS/MS fragment ion mass and of 10.0 ppm for  
182 the FT-MS parent ion mass was allowed. For TMT-10plex analysis, lysine and the N-termini  
183 were set as quantification modifications, while methionine oxidation and the acetylation of N-  
184 termini were set as dynamic modifications, and carbamidomethylation of cysteine was set as a  
185 static modification. The false discovery rate (FDR) and protein probabilities were calculated by  
186 a fixed PSM validator.

187 For protein quantification, the ratios between each TMT label and the 126-TMT label were used  
188 and normalized based on the protein median.

## 189 **Statistical Analysis**

190 To determine the significant metagenomic and protein changes between the different conditions  
191 under study, the Mass Profiler Professional Software v.14.5 (Agilent Technologies,  
192 Massachusetts, USA) was used. The data were log<sub>2</sub> transformed and mean-centered for the  
193 multivariate analysis (Principal Component Analysis, PCA) and the univariate statistical  
194 analysis (Student's t-test).



## 195 **Results and discussion**

### 196 **Effect of diet, ABS and FMT on body weight and fat mass.**

197 During the nine-week period, the HFD group exhibited a significant increase in body weight  
198 after week 5 ( $p < 0.001$ ), and the body fat mass measured by NMR in this group was also  
199 significantly higher. During antibiotic administration (from 10 to 11 weeks), both parameters  
200 were decreased but remained significantly different between the different dietary groups ( $p <$   
201  $0.001$ ). Nonetheless, when the FMTs began, the animals recovered their body weight, and their  
202 body mass content increased again (Fig 2). Similar results have been reported in other studies in  
203 which rats were fed a commercial diet with a high fat content [8,30]; moreover, when an  
204 antibiotic treatment is administered, normally the animals exhibit reductions in appetite and  
205 food intake, and a loss of body weight occurs [31–33]. This could be an explanation for the fact  
206 that the rats lost body weight during antibiotic treatment.

207

208 **Fig 2.** A) Measurement of body weight during the 14 weeks of study and B) the percentage of  
209 body fat measured at weeks 1, 9, 11 and 14. \* $p < 0.05$ , calculated using ANOVA.

210

### 211 **Changes in microbiota biodiversity and functionality caused** 212 **by diet.**

213 To assess the impact of diet on gut microbiota, metagenomics and metaproteomics analyses  
214 were performed in cecal samples obtained immediately after sacrifice that were divided into two  
215 equal portions for use in both omics approaches.

216 The metagenomics analysis was performed using NGS Ion Torrent Technology. The sequencing  
217 runs produced a total of 49,106,850 reads that were filtered for quality, and 25,535,562 were  
218 obtained for the QIIME analysis. From these reads, a total of 17,220 OTUs were obtained for

219 the V3 and V4 regions of the 16S rRNA gene sequence that were used to analyze the relative  
220 abundances and diversity in the microbiota at different taxonomical levels.

221 The two dominant phyla were Bacteroidetes (14.6 – 44.5%) and Firmicutes (52.6 – 84.1%) in  
222 both groups, which is in line with the results of previous studies [21,34]. The Bacteroidetes to  
223 Firmicutes ratio (B/F) was significantly increased ( $p=0.023$ ) in the HFD group (B/F=0.393)  
224 compared to the LFD group (B/F=0.294). No differences were found with regard to phylum  
225 level or alpha diversity or the Shannon and Simpson indexes, but some comparisons could be  
226 made at the family level, and a clear separation between the groups was observed (Fig 3). In  
227 total, the abundances of 9 family taxa were significantly different between the LFD- and HFD-  
228 fed rats (Table 1); 7 out of 9 were from the Firmicutes phylum, and 6 were from the  
229 Clostridiales order. Even the abundance of Clostridiales was not very high (52.0 – 89.8%), and  
230 Clostridiales was probably the order most affected by diet and was responsible for gut  
231 microbiota disruption. Similar results have been reported before that have shown clear  
232 differences in microbiota composition when a diet rich in fat is administered [19–21,35] and  
233 that the Firmicutes phylum, including the Clostridiales order, represents the taxon with the most  
234 changes in terms of microbiota composition.

235 **Fig 3.** A) PCA of the family OTU abundance and the proteins that were identified that shows  
236 the separation between the LFD and HFD groups. The first two components are shown along  
237 with the percent variance that is explained by each. The points correspond to the individual  
238 samples.

239

240

241 **Table 1:** Families with significant differences in abundance between the LFD and HFD groups.

242 Metagenomics analysis.

| Family            | Phylum         | LFD (%) | HFD (%) | Regulation | FC    | p-value |
|-------------------|----------------|---------|---------|------------|-------|---------|
| Coriobacteriaceae | Actinobacteria | 0.011   | 0.007   | down       | -2.44 | 0.029   |
| Streptococcaceae  | Firmicutes     | 0.026   | 0.012   | down       | -2.67 | 0.005   |

|                       |                |       |       |      |        |       |
|-----------------------|----------------|-------|-------|------|--------|-------|
| Christensenellaceae   | Firmicutes     | 0.196 | 0.116 | down | -1.86  | 0.004 |
| Clostridiaceae        | Firmicutes     | 0.268 | 0.088 | down | -5.07  | 0.008 |
| Dehalobacteriaceae    | Firmicutes     | 0.017 | 0.142 | up   | 5.48   | 0.017 |
| Peptostreptococcaceae | Firmicutes     | 0.188 | 0.109 | down | -6.47  | 0.007 |
| Veillonellaceae       | Firmicutes     | 2.750 | 1.706 | down | -10.86 | 0.028 |
| Mogibacteriaceae      | Firmicutes     | 0.046 | 0.019 | down | -2.46  | 0.001 |
| Desulfovibrionaceae   | Proteobacteria | 0.810 | 0.462 | down | -1.66  | 0.039 |

243

244 In addition to metagenomics, metaproteomics was performed to assess the impact of diet on  
 245 microbiota function. A total of 72 fractions were analyzed, and 1598 bacterial proteins were  
 246 identified. By filtering these proteins on the basis of their being present in at least 50% of  
 247 samples from at least one of the groups, 415 were selected due to greater confidence.

248 To assess the impact of diet, the differences between the LFD and HFD groups were identified,  
 249 which showed that 22 and 11 proteins were up-regulated in the HFD group and the LFD group,  
 250 respectively (Table 2); most of these proteins were involved in metabolic functioning and  
 251 played roles in numerous biological processes, such as the TCA and ATP metabolic pathways.  
 252 The differences in all 33 of these proteins allowed us to perfectly separate both groups (Fig 3).

253

254 **Table 2.** Proteins significantly up- or downregulated between the LFD and HFD groups.

255 Metaproteomics analysis.

| Protein                                                     | Pathway               | Family                             | Regulation | FC    | p-value |
|-------------------------------------------------------------|-----------------------|------------------------------------|------------|-------|---------|
| 60 kDa chaperonin Fragment n=1                              | ATP/energy metabolism | Ruminococcaceae                    | up         | 6.16  | 0.002   |
| 60 kDa chaperonin n=1                                       | ATP/energy metabolism | Ruminococcaceae                    | up         | 2.14  | 0.004   |
| ABC transporter n=1                                         | ATP/energy metabolism | Clostridiaceae                     | up         | 1.90  | 0.018   |
| ATP synthase subunit beta n=1                               | ATP/energy metabolism | Lachnospiraceae                    | up         | 3.65  | 0.002   |
| sn-glycerol-3-phosphate import ATP-binding protein UgpC n=1 | ATP/energy metabolism | Eubacteriaceae                     | down       | -3.75 | 0.040   |
| Flagellin n=1                                               | Bacteria              | Eubacteriaceae                     | up         | 7.72  | 0.002   |
| TonB-linked outer membrane. SusC/RagA family protein n=1    | Bacteria              | Bacteroidaceae                     | up         | 2.21  | 0.012   |
| TonB-linked outer membrane. SusC/RagA family protein n=6    | Bacteria              | Porphyromonadaceae, Bacteroidaceae | down       | -1.78 | 0.028   |

|                                                                      |                       |                                    |      |           |        |
|----------------------------------------------------------------------|-----------------------|------------------------------------|------|-----------|--------|
| Alpha-1.4 glucan phosphorylase n=1                                   | CARB Metabolism       | Clostridiaceae                     | down | -<br>2.07 | <0.001 |
| Maltose-binding periplasmic proteins/domains n=1                     | CARB Metabolism       | Clostridiaceae                     | up   | 1.83      | 0.007  |
| Phosphoglucomutase/phosphomannomutase. C-terminal domain protein n=1 | CARB Metabolism       | Bacteroidaceae                     | up   | 1.52      | 0.028  |
| Elongation factor Tu Fragment n=1                                    | Cellular Division     | Neisseriaceae                      | down | -<br>1.84 | 0.012  |
| Elongation factor Tu n=1                                             | Cellular Division     | Ruminococcaceae                    | up   | 2.52      | 0.006  |
| Elongation factor Tu n=12                                            | Cellular Division     | Bacteroidaceae                     | up   | 1.54      | 0.030  |
| Formate C-acetyltransferase n=1                                      | Glycolysis            | Ruminococcaceae                    | up   | 10.2<br>2 | <0.001 |
| Glyceraldehyde-3-phosphate dehydrogenase n=1                         | Glycolysis            | Clostridiaceae                     | down | -<br>1.62 | 0.014  |
| Glyceraldehyde-3-phosphate dehydrogenase n=3                         | Glycolysis            | Eubacteriaceae                     | up   | 3.78      | 0.005  |
| Dissimilatory sulfite reductase B n=1                                | Iron metabolism       | Desulfovibrionaceae                | down | -<br>1.72 | 0.024  |
| Uncharacterized protein Fragment n=1                                 | Non                   | Microbacteriaceae                  | down | -<br>2.46 | 0.043  |
| Uncharacterized protein n=1                                          | Non                   | Rikenellaceae                      | down | -<br>1.66 | 0.004  |
| Uncharacterized protein n=1                                          | Non                   | Bacteroidaceae                     | up   | 2.03      | 0.017  |
| Uncharacterized protein n=1                                          | Non                   | Desulfovibrionaceae                | down | -<br>1.52 | 0.048  |
| Uncharacterized protein n=1                                          | Non                   | Lachnospiraceae                    | up   | 2.50      | 0.001  |
| 30S ribosomal protein S8 n=1                                         | Ribosomal/translation | Lachnospiraceae                    | down | -<br>2.12 | 0.034  |
| 50S ribosomal protein L1 n=2                                         | Ribosomal/translation | Prevotellaceae                     | up   | 1.71      | 0.008  |
| 50S ribosomal protein L10 n=1                                        | Ribosomal/translation | Lachnospiraceae                    | up   | 2.07      | 0.016  |
| 50S ribosomal protein L4 n=7                                         | Ribosomal/translation | Bacteroidaceae                     | up   | 1.78      | 0.027  |
| 50S ribosomal protein L7/L12 n=2                                     | Ribosomal/translation | Clostridiaceae,<br>Peptococcaceae  | up   | 1.66      | 0.001  |
| Acetyl-CoA C-acetyltransferase n=2                                   | TCA                   | Lachnospiraceae,<br>Clostridiaceae | up   | 1.74      | 0.032  |
| Acyl-CoA dehydrogenase n=1                                           | TCA                   | Lachnospiraceae                    | up   | 1.53      | 0.014  |
| Acyl-CoA dehydrogenase n=2                                           | TCA                   | Peptostreptococcaceae              | up   | 2.37      | 0.001  |
| Methylmalonyl-CoA mutase n=1                                         | TCA                   | Porphyromonadaceae                 | down | -<br>2.00 | 0.007  |
| Phosphoenolpyruvate carboxykinase ATP n=1                            | TCA                   | Lachnospiraceae                    | up   | 3.18      | 0.008  |

256

257 Moreover, each protein was assigned to a family taxon, and if we compare the phyla and orders

258 corresponding to the significant proteins we found, we find that all such proteins were derived

259 from Firmicutes and Clostridiales, which is in line with the metagenomics analysis. However,  
260 the correlation between the metagenomics and metaproteomics analyses was not complete at the  
261 family taxa level.

262 Few studies have used similar experimental approaches that can corroborate our results. Only a  
263 single previous study carried out in our laboratory assessed the functionality of microbiota [21],  
264 and other studies performed in mice have explored the changes in the main functions of the  
265 microbiota resulting from a high-fat diet [19]. In both cases, the majority of the functions  
266 affected by microbiota were involved in important metabolic functions.

## 267 **The microbiota composition was disrupted by antibiotic** 268 **treatment.**

269 After the assessment of diet, a metagenomics analysis was performed in each dietary group after  
270 ABS treatment to verify microbiota disruption, and the results were compared to those from  
271 groups without ABS administration. The LFD group was compared to the LFD+ABS group,  
272 and the HFD group was compared to the HFD+ABS group.

273 The actual OTU abundance is shown in Fig 4A, which shows that the majority of the bacterial  
274 content in the cecal microbiota was depleted by antibiotic treatment and also indicates that the  
275 bacterial content was restored by FMT.

276

277 **Fig 4.** A) Differences in the actual OTU abundances among the different groups at the phylum  
278 taxon levels. B) PCA of the differences between the groups treated with and without ABS. The  
279 first two components are shown along with the percentages of variance that they explain. The  
280 points correspond to individual samples.

281

282 Regarding the metagenomics results in the LFD groups, a decrease in both Bacteroidetes (LFD  
283 21.2%; LFD+ABS 10.5%) and Firmicutes (LFD 74.0%; LFD+ABS 45.9%) phyla were  
284 observed in the LFD+ABS group, whereas Proteobacteria (LFD 1.0%; LFD+ABS 38.9%;  
285  $p=0.007$ ) represented the dominant phylum after antibiotic treatment. The B/F ratio was

286 significantly decreased (LFD B/F=0.294; LFD+ABS B/F=0.216;  $p=0.039$ ); furthermore, the  
287 alpha diversity based on observed OTUs and the Shannon and Simpson indexes was not  
288 significant ( $p=0.192$ ,  $p=0.095$ , and  $p=9.982$ , respectively).

289 In contrast to the LFD-fed rats, in the HFD-fed rats no significant differences were found for the  
290 B/F ratio (HFD B/F=0.393; HFD+ABS B/F=0.382;  $p=0.110$ ), although similar results due to  
291 antibiotic treatment occurred in the LFD+ABS group, which resulted in dramatic decreases in  
292 both phyla (Bacteroidetes, HFD 26.4%, HFD+ABS 8.70%; Firmicutes, HFD 70.5%, HFD+ABS  
293 26.5%) and an enormous increase in Proteobacteria (HFD 0.6%; HFD+ABS 59.1%;  $p<0.001$ ).  
294 Moreover, the alpha diversity decreased significantly in the HFD+ABS group compared to the  
295 HFD group (observed OTUs  $p=0.011$ ; Shannon index  $p=0.009$ ; Simpson index  $p=0.011$ ).

296 The results found in both ABS groups were consistent with those of previous studies where a  
297 similar cocktail of ABS was administered to wild-type mice, which caused the relative  
298 abundances of Bacteroidetes and Firmicutes to decrease, while the abundances of Proteobacteria  
299 and Cyanobacteria increased [24,33]. These results could be explained by differences in  
300 antibiotic effectiveness against bacteria from different phyla. As can be seen, the antibiotics had  
301 stronger activity against bacteria from the Bacteroidetes and Firmicutes phyla and are the reason  
302 why changes in the abundance of Proteobacteria were observed in these particular groups,  
303 although the bacterial DNA quantity was considerably lower in the ABS samples.

304 In addition, the relative abundances were compared at the family level for both the LFD and  
305 HFD groups. In the LFD group comparison, distinct differences were found in 18 family taxa,  
306 most of which are in the Firmicutes and Proteobacteria phyla, whereas in the HFD groups  
307 distinct differences were found for 15 family taxa among the Bacteroidetes, Firmicutes and  
308 Proteobacteria phyla (Table 3 and Fig 4B). A total of 10 families were found to be in common  
309 in rats fed both diets: *S24-7* from Bacteroidetes; *Enterococcaceae*, *Streptococcaceae*,  
310 *Christensenellaceae*, *Lachnospiraceae*, *Peptococcaceae* and *Ruminococcaceae* from  
311 Firmicutes; *Alcaligenaceae*, *Enterobacteriaceae* and *Pseudomonadaceae* from Proteobacteria.  
312 All of these were regulated equally in the ABS groups compared to the respective non-ABS  
313 groups. Similar changes in microbiota composition were found in several previous studies of

314 chronic antibiotic exposure [36–38] that showed a significant reduction of bacterial richness and  
 315 diversity and corroborated the effectiveness of gut microbiota depletion for FMT studies.  
 316  
 317 **Table 3:** Families with significant differences in abundance between the diet-only groups and  
 318 the respective diet-plus-ABS groups. Metagenomics analysis

| Family                | Phylum          | LFD (%) | LFD+ABS (%) | HFD (%) | HFD+ABS (%) | Regulation          | FC                                        | p-value                                 |
|-----------------------|-----------------|---------|-------------|---------|-------------|---------------------|-------------------------------------------|-----------------------------------------|
| Propionibacteriaceae  | Actinobacteria  | 0.000   | 0.011       |         |             | up <sup>a</sup>     | 8.39 <sup>a</sup>                         | 0.044 <sup>a</sup>                      |
| Bacteroidaceae        | Bacteroidetes   |         |             | 15.513  | 1.383       | down <sup>b</sup>   | -9.47                                     | 0.002 <sup>b</sup>                      |
| Rikenellaceae         | Bacteroidetes   |         |             | 1.451   | 0.226       | down <sup>b</sup>   | -6.50                                     | 0.007 <sup>a</sup> / 0.012 <sup>b</sup> |
| S24-7                 | Bacteroidetes   | 5.312   | 2.320       | 4.086   | 1.007       | down <sup>a,b</sup> | -3.24 <sup>a</sup> / 4.31 <sup>b</sup>    | 0.005 <sup>a</sup>                      |
| Odoribacteraceae      | Bacteroidetes   | 0.064   | 0.036       |         |             | down <sup>a</sup>   | -4.84 <sup>a</sup>                        | 0.025 <sup>a</sup>                      |
| Paraprevotellaceae    | Bacteroidetes   |         |             | 5.193   | 0.463       | down <sup>b</sup>   | -9.71 <sup>b</sup>                        | 0.008 <sup>b</sup>                      |
| Deferribacteraceae    | Deferribacteres |         |             | 0.100   | 0.014       | down <sup>b</sup>   | -8.43                                     | 0.008 <sup>b</sup>                      |
| Staphylococcaceae     | Firmicutes      | 0.000   | 0.011       |         |             | up <sup>a</sup>     | 12.03 <sup>a</sup>                        | <0.001 <sup>a</sup>                     |
| Enterococcaceae       | Firmicutes      | <0.001  | 0.130       | <0.001  | 0.014       | up <sup>a,b</sup>   | 115.51 <sup>a</sup> / 29.05 <sup>b</sup>  | <0.001 <sup>a,b</sup>                   |
| Streptococcaceae      | Firmicutes      | 0.026   | 17.981      | 0.012   | 1.655       | up <sup>a,b</sup>   | 212.53 <sup>a</sup> / 162.04 <sup>b</sup> | <0.001 <sup>a,b</sup>                   |
| Christensenellaceae   | Firmicutes      | 0.196   | 0.002       | 0.116   | 0.016       | down <sup>a,b</sup> | -2.83 <sup>a</sup> / -5.75 <sup>b</sup>   | 0.016 <sup>a</sup> / 0.013 <sup>b</sup> |
| Dehalobacteriaceae    | Firmicutes      |         |             | 0.142   | 0.014       | down <sup>b</sup>   | -10.19 <sup>b</sup>                       | 0.020 <sup>b</sup>                      |
| Lachnospiraceae       | Firmicutes      | 14.395  | 7.887       | 10.707  | 1.346       | down <sup>a,b</sup> | -2.79 <sup>a</sup> / -6.92                | 0.018 <sup>a</sup> / 0.001 <sup>b</sup> |
| Peptococcaceae        | Firmicutes      | 0.702   | 0.271       | 0.569   | 0.049       | down <sup>a,b</sup> | -4.64 <sup>a</sup> / -10.88 <sup>b</sup>  | 0.001 <sup>a</sup> / 0.004 <sup>b</sup> |
| Peptostreptococcaceae | Firmicutes      | 0.188   | 0.099       |         |             | down <sup>a</sup>   | -2.75 <sup>a</sup>                        | 0.027 <sup>a</sup>                      |

|                    |                |        |        |        |        |                     |                                             |                                               |
|--------------------|----------------|--------|--------|--------|--------|---------------------|---------------------------------------------|-----------------------------------------------|
| Ruminococcaceae    | Firmicutes     | 16.887 | 9.349  | 19.415 | 2.126  | down <sup>a,b</sup> | -2.57 <sup>a</sup><br>/-7.18 <sup>b</sup>   | 0.010 <sup>a</sup><br>/<br>0.001 <sup>b</sup> |
| Mogibacteriaceae   | Firmicutes     | 0.046  | 0.026  |        |        | down <sup>a</sup>   | -3.01 <sup>a</sup>                          | 0.019 <sup>a</sup>                            |
| Alcaligenaceae     | Proteobacteria | 0.070  | 1.418  | 0.084  | 10.011 | up <sup>a,b</sup>   | 10.99 <sup>a</sup><br>/8.30 <sup>b</sup>    | 0.029 <sup>a</sup><br>/0.028 <sup>b</sup>     |
| Enterobacteriaceae | Proteobacteria | 0.057  | 19.103 | 0.053  | 41.999 | up <sup>a,b</sup>   | 227.03 <sup>a</sup><br>/194.8 <sup>b</sup>  | <0.001 <sup>a,b</sup>                         |
| Pasteurellaceae    | Proteobacteria | 0.010  | 0.005  |        |        | down <sup>a</sup>   | -2.53 <sup>a</sup>                          | 0.031 <sup>a</sup>                            |
| Moraxellaceae      | Proteobacteria | 0.001  | 0.141  |        |        | up <sup>a</sup>     | 28.33 <sup>a</sup>                          | 0.024 <sup>a</sup>                            |
| Pseudomonadaceae   | Proteobacteria | 0.001  | 8.852  | 0.002  | 15.388 | up <sup>a,b</sup>   | 1171.5 <sup>a</sup><br>/3125.6 <sup>b</sup> | <0.001 <sup>a,b</sup>                         |
| Anaeroplasmataceae | Tenericutes    | 0.011  | 0.159  |        |        | up <sup>a</sup>     | 16.32 <sup>a</sup>                          | 0.021 <sup>a</sup>                            |

319 a) LFD versus LFD+ABS  
320 b) HFD versus HFD+ABS

321

## 322 **FMT restored microbiota biodiversity and functionality.**

323 To assess the use of FMT as a possible treatment for overweight or obesity caused by dietary  
324 habits, FMT was performed by transplanting cecal microbiota content from LFD rats to HFD  
325 rats previously depleted by ABS treatment. The metagenomics analysis revealed that  
326 Bacteroidetes (LFD 21.2%, HFD 26.4%, FMT 18.0%) and Firmicutes bacteria (LFD 74.0%,  
327 HFD 70.5%, FMT 77.0%) were restored after FMT to levels similar to those found prior to  
328 antibiotic treatment, and consequently Proteobacteria (LFD 1.0%, HFD 0.6%, FMT 2.0%) were  
329 decreased considerably. As can be observed, the B/F ratio was more similar between the LFD  
330 (B/F=0.294) and FMT (B/F=0.233) groups since no significant differences were observed  
331 (p=0.109), whereas the B/F ratio was significantly different in the HFD group (B/F=0.393,  
332 p=0.011). Regarding alpha diversity, some differences were found in terms of the observed  
333 OTUs and the Shannon and Simpson indexes (p=0.001, p<0.001, and p<0.001, respectively) in  
334 the FMT groups compared to both the LFD and the HFD group (one-way ANOVA). These



335 differences could be ameliorated by prolonging the FMT treatment in future studies, but these  
 336 differences were quite small.

337 Additionally, a decision was made to determine whether some differences could be found at the  
 338 family level. After one-way ANOVA, the abundances of 10 families were found to be  
 339 significantly different between two of the three experimental groups, as shown in Table 4.  
 340 However, Tukey post hoc tests revealed that the abundances of only 3 families were  
 341 significantly different between the LFD and HFD groups (*Clostridiaceae*, *Christensenellaceae*  
 342 and *Mogibacteriaceae*) and were not significantly different when the FMT group was compared  
 343 to the LFD group. Moreover, these three families were equally regulated in the LFD and FMT  
 344 groups when compared to the HFD group. This indicates greater similarity between the FMT  
 345 and LFD groups than between either of these groups and the HFD group. PCA and hierarchical  
 346 cluster analysis (HCA) based on the relative abundances of these 3 families was performed to  
 347 assess the similarities between the LFD, HFD and FMT groups. As shown in Fig 5A and B, the  
 348 FMT group was more similar to the LFD group than the HFD group even when the rats were  
 349 fed a hypercaloric diet during and after ABS and FMT treatment.

350

351 **Table 4.** Families with significant differences in abundance based on ANOVA between the  
 352 LFD, HFD and FMT groups. Metagenomics analysis.

| Family             | Phylum          | LFD (%) | HFD (%) | FMT (%) | Regulation FMT/LFD | FC FMT/LFD | Regulation FMT/HFD | FC FMT/HFD | Regulation HFD/LFD | FC HFD/LFD | p-value |
|--------------------|-----------------|---------|---------|---------|--------------------|------------|--------------------|------------|--------------------|------------|---------|
| Coriobacteriaceae  | Actinobacteria  | 0.011   | 0.007   | 0.014   | up                 | 1.01       | up                 | 2.46       | down               | -2.44      | 0.036   |
| Prevotellaceae     | Bacteroidetes   | 0.259   | 0.391   | 0.033   | down               | -11.02     | down               | -17.47     | up                 | 1.59       | <0.001  |
| Odoribacteraceae   | Bacteroidetes   | 0.064   | 0.001   | 0.000   | down               | -219.21    | down               | -80.82     | down               | -2.71      | <0.001  |
| Paraprevotellaceae | Bacteroidetes   | 2.923   | 5.193   | 0.089   | down               | -50.24     | down               | -98.25     | up                 | 1.96       | <0.001  |
| Deferribacteraceae | Deferribacteres | 0.210   | 0.100   | 0.002   | down               | -60.29     | down               | -45.95     | down               | -1.31      | <0.001  |
| Christense         | Firmicutes      | 0.19    | 0.11    | 0.19    | down               | -1.03      | up                 | 1.80       | down               | -1.86      | 0.0     |

|                     |                |       |       |       |      |       |    |      |      |       |       |
|---------------------|----------------|-------|-------|-------|------|-------|----|------|------|-------|-------|
| nellaceae           | es             | 6     | 6     | 7     |      |       |    |      |      |       | 08    |
| Clostridiaceae      | Firmicutes     | 0.268 | 0.088 | 0.130 | down | -2.68 | up | 1.89 | down | -5.07 | 0.021 |
| Mogibacteriaceae    | Firmicutes     | 0.019 | 0.046 | 0.036 | down | -1.36 | up | 1.81 | down | -2.46 | 0.007 |
| Erysipelotrichaceae | Firmicutes     | 0.049 | 0.021 | 0.137 | up   | 2.57  | up | 5.90 | down | -2.30 | 0.002 |
| Desulfovibrionaceae | Proteobacteria | 0.810 | 0.462 | 1.537 | up   | 1.95  | up | 3.24 | down | -1.66 | 0.001 |

353

354 **Fig 5.** A) PCA of OTU abundance. The first two components are shown along with the  
 355 percentage of variance that they explain. The points correspond to individual samples. B)  
 356 Hierarchical clustering analysis of the three significant families in the LFD, HFD and FMT  
 357 groups.

358

359 Furthermore, metaproteomics was performed to assess the disruption of microbiota  
 360 functionality due to diet and FMT. To assess whether there were some differences between  
 361 these three groups, one-way ANOVA was performed, and a total of 235 proteins were found to  
 362 be different in one of the groups. These proteins allowed us to perfectly separate these three  
 363 groups during PCA (Fig 6A). Of these 235 proteins, 155 and 194 were different in the FMT  
 364 group compared to the LFD and HFD groups, respectively. Moreover, 21 proteins were  
 365 significantly different between the LFD and HFD groups, and this could also explain the  
 366 differences between these groups and the FMT group. As seen, the greater number of significant  
 367 proteins in the FMT group compared to the LFD and HFD groups may be due to the low level  
 368 of biodiversity observed in the FMT group, as previously described.

369

370 **Fig 6.** A) PCA of up- and downregulated proteins showing the separation between the three  
 371 groups. The first two components are shown along with the percentages of variance that they  
 372 explain. The points correspond to individual samples. B) Percentages of proteins that represent  
 373 the 15 most abundant protein functions according to Gene Ontology (GO) terms in the LFD,

374 HFD and FMT groups. C) Hierarchical clustering analysis of 21 significant proteins in the LFD,

375 HFD and FMT groups.

376

377 Subsequently, each of these proteins was assigned to a taxonomical family to correlate them

378 with the metagenomics results, but only the Clostridiaceae family showed significant

379 differences based on both omics approaches (Table 5). However, if we made the same

380 comparison based on the order taxon, the majority of families that showed significant

381 differences were from the Clostridiales order and the Firmicutes phylum, as was observed when

382 only the LFD and HFD groups were compared.

383

384 **Table 5.** Proteins significantly up- or downregulated between the LFD, HFD and FMT groups.

385 Metaproteomics analysis.

| Protein                            | Pathway               | Family          | Regulation FMT/LFD | FC FMT/LFD | Regulation FMT/HFD | FC FMT/HFD | Regulation HFD/LFD | FC HFD/LFD | p-value |
|------------------------------------|-----------------------|-----------------|--------------------|------------|--------------------|------------|--------------------|------------|---------|
| 60 kDa chaperonin Fragment n=1     | ATP/energy metabolism | Ruminococcaceae | up                 | 1.22       | down               | -5.05      | up                 | 6.16       | 0.023   |
| 60 kDa chaperonin n=1              | ATP/energy metabolism | Ruminococcaceae | up                 | 1.11       | down               | -1.94      | up                 | 2.14       | 0.039   |
| ABC transporter n=1                | ATP/energy metabolism | Clostridiaceae  | down               | -1.36      | down               | -2.59      | up                 | 1.90       | 0.001   |
| ATP synthase subunit beta n=1      | ATP/energy metabolism | Lachnospiraceae | down               | -1.53      | down               | -5.61      | up                 | 3.65       | <0.001  |
| ATP synthase subunit alpha n=1     | ATP/energy metabolism | Lachnospiraceae | down               | -1.42      | down               | -1.99      | up                 | 1.40       | <0.001  |
| Flagellin n=1                      | Bacteria              | Eubacteriaceae  | up                 | 1.98       | down               | -3.91      | up                 | 7.72       | 0.003   |
| Alpha-1,4 glucan phosphorylase n=1 | CARB Metabolism       | Clostridiaceae  | down               | -2.82      | down               | -1.36      | down               | -2.07      | <0.001  |
| Elongation factor Tu n=1           | Cellular Division     | Ruminococcaceae | up                 | 1.18       | down               | -2.13      | up                 | 2.52       | 0.044   |
| Enolase n=1                        | Glycolysis            | Clostridiaceae  | up                 | 1.18       | down               | -1.19      | up                 | 1.40       | 0.029   |
| Formate C-acetyltransferase n=1    | Glycolysis            | Ruminococcaceae | down               | -1.06      | down               | -10.79     | up                 | 10.22      | <0.001  |

|                                                 |                        |                                 |      |       |      |       |      |       |        |
|-------------------------------------------------|------------------------|---------------------------------|------|-------|------|-------|------|-------|--------|
| Glyceraldehyde-3-phosphate dehydrogenase n=1    | Glycolysis             | Clostridiaceae                  | down | -1.70 | down | -1.05 | down | -1.62 | 0.017  |
| Glyceraldehyde-3-phosphate dehydrogenase n=3    | Glycolysis             | Eubacteriaceae                  | down | -1.02 | down | -3.85 | up   | 3.78  | 0.011  |
| Methylmalonyl-CoA mutase n=1                    | Minerals Metabolism    | Porphyromonadaceae              | down | -2.05 | down | -1.03 | down | -2.00 | 0.015  |
| Uncharacterized protein n=1                     | Non                    | Rikenellaceae                   | up   | 1.20  | up   | 2.00  | down | -1.66 | <0.001 |
| Uncharacterized protein n=1                     | Non                    | Lachnospiraceae                 | down | -1.12 | down | -2.81 | up   | 2.50  | <0.001 |
| 50S ribosomal protein L10 n=1                   | Ribosomal/ Translation | Lachnospiraceae                 | down | -1.44 | down | -2.99 | up   | 2.07  | 0.001  |
| 50S ribosomal protein L7/L12 n=2                | Ribosomal/ Translation | Clostridiaceae. Peptococcaceae  | up   | 1.19  | down | -1.39 | up   | 1.66  | 0.020  |
| Acetyl-CoA C-acetyltransferase n=2              | TCA                    | Lachnospiraceae. Clostridiaceae | up   | 1.80  | up   | 1.03  | up   | 1.74  | 0.023  |
| Acyl-CoA dehydrogenase n=1                      | TCA                    | Lachnospiraceae                 | up   | 1.05  | down | -1.46 | up   | 1.53  | 0.010  |
| Acyl-CoA dehydrogenase short-chain specific n=2 | TCA                    | Peptostreptococcaceae           | down | -1.57 | down | -3.72 | up   | 2.37  | <0.001 |
| Phosphoenolpyruvate carboxykinase ATP n=1       | TCA                    | Lachnospiraceae                 | up   | 1.00  | down | -3.16 | up   | 3.18  | 0.002  |

386

387

388 To more deeply understand the function of the whole gut microbiome, GO functions were  
 389 attributed to each protein, and the 15 most highly represented activities are shown in Fig 6B.

390 The most highly represented functions in each group were represented by proteins involved in  
 391 the structure of the ribosome [GO:0003735], translation [GO:0006412], the cytoplasm  
 392 [GO:0005737] and ATP binding [GO:0005524]. These four GO functions were slightly  
 393 increased in the HFD group, whereas ATP binding and cytoplasmic proteins were decreased in  
 394 the FMT group compared to both the HFD and LFD groups. Additionally, proteins representing  
 395 integral components of the membrane [GO:0016021] were increased in the FMT group  
 396 compared to the other groups.

397 Based on their metabolic functions, the majority of these proteins were involved in important  
 398 metabolic pathways such as those involved in ATP/energy metabolism or glycolysis. A total of

399 8 proteins were equally regulated in both the LFD and FMT groups compared to the HFD  
400 group, and important proteins such as Acyl-CoA dehydrogenase and phosphoenolpyruvate  
401 carboxykinase, both from the Lachnospiraceae family, were found. Furthermore, two significant  
402 proteins, enolase (n=1) and 50S ribosomal protein L7/L12 (n=2), were from Clostridiaceae,  
403 whereas the other significant proteins were not clearly correlated with the metagenomics results.  
404 It needs to be taken into account that protein databases can be more accurate for certain families  
405 than others, and this can affect the taxonomical assignment. These results were represented in  
406 the PCA and the HCA (Fig 6AC), where it can be observed that the FMT group clusters closer  
407 to the LFD group than the HFD group, indicating that the functionality of gut microbiota after  
408 FMT is more similar to that of healthy donor microbiota.

409 Additionally, a correlation analysis between the metagenomics and metaproteomics results was  
410 performed. As shown in Fig 7, the profile that was obtained was very similar in terms of the  
411 correlation between the metagenomics and metaproteomics results for the relative abundance of  
412 the three significant families that contained all of the significant proteins. These results can be  
413 explained by the similarities between these three families, since they are from the same order  
414 (Clostridiales) and phylum (Firmicutes). Moreover, clustering of the proteins that belong to the  
415 same family or families that are taxonomically related is also observed. Overall, one of the most  
416 interesting proteins in our study was glyceraldehyde-3-phosphate dehydrogenase from  
417 Clostridiaceae, which has a moderate positive correlation ( $r=0.5$ ) with the metagenomics results.  
418 The slope for this correlation was  $> 1.3$  (metagenomics vs metaproteomics), which indicates  
419 that the abundance of this protein and, therefore, its function was diminished in the HFD group  
420 vs the LFD and FMT groups. Glyceraldehyde-3-phosphate dehydrogenase was found to control  
421 NAD-dependent glycolytic activity in some Clostridium species. It is known that Clostridium  
422 species are gram-positive obligate anaerobes and typically perform butyric acid fermentation  
423 that is carried out during the exponential growth phase, and this generates acetate and butyrate  
424 as the main fermentation products from glucose. In this sense, butyrate products could be  
425 considered short-chain fatty acids (SCFAs) produced by gut microbiota [39,40].

426

427 **Fig 7.** Significant correlations between families and proteins in the LFD, HFD and FMT groups.

428

429 Finally, the corroboration of our findings was challenging due to the low number of studies that  
430 have been published that have assessed the relationship between metaproteomics and hosts, and  
431 even fewer have examined this after FMT. Nevertheless, a study that was performed in rats fed  
432 a diet rich in fat and rats fed a chow diet found that Firmicutes were presumed to benefit from a  
433 high-fat diet [41], which is contrary to our findings that showed that the abundance of  
434 Firmicutes was reduced in the HFD group. However, these differences depend on the part of the  
435 colon that is analyzed, as shown in this paper. Moreover, another study performed in pigs found  
436 that proteins involved in carbohydrate metabolism showed the most changes in HFD animals,  
437 but proteins involved in this process were not changed in our study [42].

438

## 439 **Conclusions**

440 The gut microbiota is essential for maintaining health and has a primary role in metabolism and  
441 homeostasis, and its alteration during obesity is a problem that needs to be addressed. Our  
442 results applied a combination of metagenomics and metaproteomics approaches to confirm  
443 some previous observations: (i) the diet can alter the biochemical composition of the gut  
444 microbiota either by shifting the phylotype composition or the activity of bacterial cells; (ii)  
445 antibiotics disrupt microbiota biodiversity; (iii) FMT is effective in recolonizing the gut  
446 microbiota and in restoring some metabolic functions. When testing these three microbiota  
447 modulation strategies, different changes were observed in the bacterial metaproteome,  
448 demonstrating that every single change in the host environment can affect microbiota function.  
449 In addition to results observed over a short-term period of time [16,18], these findings show that  
450 a HFD has a major impact on the mouse cecal microbiota that extends beyond compositional  
451 changes to major alterations in bacterial physiology, and FMT can be considered a new strategy  
452 to treat obesity.

453 Moreover, this study reaffirms that metaproteomics should be a complementary tool used along  
454 with metagenomics and that combining the results of both approaches can result in the  
455 improved characterization of cecal microbiota.

## 456 **References**

- 457 1. Shen J, Obin MS, Zhao L. The gut microbiota, obesity and insulin resistance. *Mol*  
458 *Aspects Med.* Elsevier Ltd; 2013;34: 39–58. doi:10.1016/j.mam.2012.11.001
- 459 2. Heymsfield SB, Wadden TA. Mechanisms, Pathophysiology, and Management of  
460 Obesity. *N Engl J Med.* 2017;376: 254–266. doi:10.1056/NEJMra1514009
- 461 3. Grasa L, Abecia L, Forcén R, Castro M, de Jalón JAG, Latorre E, et al. Antibiotic-  
462 Induced Depletion of Murine Microbiota Induces Mild Inflammation and Changes in  
463 Toll-Like Receptor Patterns and Intestinal Motility. *Microb Ecol.* 2015;70: 835–848.  
464 doi:10.1007/s00248-015-0613-8
- 465 4. Cani PD, Delzenne NM. The gut microbiome as therapeutic target. *Pharmacol Ther.*  
466 Elsevier Inc.; 2011;130: 202–212. doi:10.1016/j.pharmthera.2011.01.012
- 467 5. Ottman N, Smidt H, de Vos WM, Belzer C. The function of our microbiota: who is out  
468 there and what do they do? *Front Cell Infect Microbiol.* 2012;2: 104.  
469 doi:10.3389/fcimb.2012.00104
- 470 6. Buettner R, Schölmerich J, Bollheimer LC. High-fat diets: Modeling the metabolic  
471 disorders of human obesity in rodents. *Obesity.* 2007. pp. 798–808.  
472 doi:10.1038/oby.2007.608
- 473 7. Nilsson C, Raun K, Yan F, Larsen MO, Tang-Christensen M. Laboratory animals as  
474 surrogate models of human obesity. *Acta Pharmacol Sin.* 2012;33: 173–181.  
475 doi:10.1038/aps.2011.203
- 476 8. Zhao L, Zhang Q, Ma W, Tian F, Shen H, Zhou M. A combination of quercetin and  
477 resveratrol reduces obesity in high-fat diet-fed rats by modulation of gut microbiota.  
478 *Food Funct.* England; 2017;8: 4644–4656. doi:10.1039/c7fo01383c
- 479 9. Boi SK, Buchta CM, Pearson NA, Francis MB, Meyerholz DK, Grobe JL, et al. Obesity

- 480 alters immune and metabolic profiles: New insight from obese-resistant mice on high-fat  
481 diet. *Obesity* (Silver Spring). United States; 2016;24: 2140–2149.  
482 doi:10.1002/oby.21620
- 483 10. Ha M, Sabherwal M, Duncan E, Stevens S, Stockwell P, McConnell M, et al. In-Depth  
484 Characterization of Sheep (*Ovis aries*) Milk Whey Proteome and Comparison with Cow  
485 (*Bos taurus*). *PLoS One*. United States; 2015;10: e0139774.  
486 doi:10.1371/journal.pone.0139774
- 487 11. Janssen AWF, Kersten S. The role of the gut microbiota in metabolic health. *FASEB J*.  
488 2015;9: 577–589. doi:10.1096/fj.14-269514
- 489 12. Lee P, Yacyshyn BR, Yacyshyn MB. Gut microbiota and obesity: An opportunity to  
490 alter obesity through faecal microbiota transplant (FMT). *Diabetes, Obes Metab*. 2018;  
491 doi:10.1111/dom.13561
- 492 13. Lai ZL, Tseng CH, Ho HJ, Cheung CKY, Lin JY, Chen YJ, et al. Fecal microbiota  
493 transplantation confers beneficial metabolic effects of diet and exercise on diet-induced  
494 obese mice. *Sci Rep*. 2018;8: 1–11. doi:10.1038/s41598-018-33893-y
- 495 14. Sun W, Guo Y, Zhang S, Chen Z, Wu K, Liu Q, et al. Fecal Microbiota Transplantation  
496 Can Alleviate Gastrointestinal Transit in Rats with High-Fat Diet-Induced Obesity via  
497 Regulation of Serotonin Biosynthesis. *Biomed Res Int*. Hindawi; 2018;2018.  
498 doi:10.1155/2018/8308671
- 499 15. Schuijt TJ, Lankelma JM, Scicluna BP, De Sousa E Melo F, Roelofs JJTH, De Boer JD,  
500 et al. The gut microbiota plays a protective role in the host defence against  
501 pneumococcal pneumonia. *Gut*. 2016;65: 575–583. doi:10.1136/gutjnl-2015-309728
- 502 16. Le Bastard Q, Ward T, Sidiropoulos D, Hillmann BM, Chun CL, Sadowsky MJ, et al.  
503 Fecal microbiota transplantation reverses antibiotic and chemotherapy-induced gut  
504 dysbiosis in mice. *Sci Rep*. Springer US; 2018;8: 1–11. doi:10.1038/s41598-018-24342-  
505 x
- 506 17. Wang S, Huang M, You X, Zhao J, Chen L, Wang L, et al. Gut microbiota mediates the  
507 anti-obesity effect of calorie restriction in mice. *Sci Rep*. Springer US; 2018;8: 2–15.



- 508           doi:10.1038/s41598-018-31353-1
- 509   18.   Zhou D, Pan Q, Shen F, Cao HX, Ding WJ, Chen YW, et al. Total fecal microbiota  
510       transplantation alleviates high-fat diet-induced steatohepatitis in mice via beneficial  
511       regulation of gut microbiota. *Sci Rep. Springer US*; 2017;7: 1–11. doi:10.1038/s41598-  
512       017-01751-y
- 513   19.   Daniel H, Gholami AM, Berry D, Desmarchelier C, Hahne H, Loh G, et al. High-fat diet  
514       alters gut microbiota physiology in mice. *ISME J.* 2014;8: 295–308.  
515       doi:10.1038/ismej.2013.155
- 516   20.   del Bas JM, Guirro M, Boqué N, Cereto A, Ras R, Crescenti A, et al. Alterations in gut  
517       microbiota associated with a cafeteria diet and the physiological consequences in the  
518       host. *Int J Obes. Macmillan Publishers Limited, part of Springer Nature*; 2017;  
519       Available: <http://dx.doi.org/10.1038/ijo.2017.284>
- 520   21.   Guiro M, Costa A, Gual-Grau A, Mayneris-Perxachs J, Torrell H, Herrero P, et al.  
521       Multi-omics approach to elucidate the gut microbiota activity: Metaproteomics and  
522       metagenomics connection. *Electrophoresis.* 2018;39: 1692–1701.  
523       doi:10.1002/elps.201700476
- 524   22.   Tanca A, Manghina V, Fraumene C, Palomba A, Abbondio M, Deligios M, et al.  
525       Metaproteogenomics reveals taxonomic and functional changes between cecal and fecal  
526       microbiota in mouse. *Front Microbiol.* 2017;8: 391. doi:10.3389/fmicb.2017.00391
- 527   23.   Bäckhed F, Ding H, Wang T, Hooper L V, Koh GY, Nagy A, et al. The gut microbiota  
528       as an environmental factor that regulates fat storage. *Proc Natl Acad Sci U S A.*  
529       2004;101: 15718–23. doi:10.1073/pnas.0407076101
- 530   24.   Reikvam DH, Erofeev A, Sandvik A, Grcic V, Jahnsen FL, Gaustad P, et al. Depletion  
531       of murine intestinal microbiota: Effects on gut mucosa and epithelial gene expression.  
532       *PLoS One.* 2011;6: 1–13. doi:10.1371/journal.pone.0017996
- 533   25.   Hernández-Jarguín A, Díaz-Sánchez S, Villar M, de la Fuente J. Integrated  
534       metatranscriptomics and metaproteomics for the characterization of bacterial microbiota  
535       in unfed *Ixodes ricinus*. *Ticks Tick Borne Dis. Elsevier*; 2018;9: 1241–1251.

- 536 doi:10.1016/j.ttbdis.2018.04.020
- 537 26. Xiao M, Yang J, Feng Y, Zhu Y, Chai X, Wang Y. Metaproteomic strategies and  
538 applications for gut microbial research. *Appl Microbiol Biotechnol. Applied*  
539 *Microbiology and Biotechnology*; 2017;101: 3077–3088. doi:10.1007/s00253-017-8215-  
540 7
- 541 27. Wei F, Wu Q, Hu Y, Huang G, Nie Y, Yan L. Conservation metagenomics: a new  
542 branch of conservation biology. *Sci China Life Sci. China*; 2018; doi:10.1007/s11427-  
543 018-9423-3
- 544 28. Caporaso JG, Kuczynski J, Stombaugh J, Bittinger K, Bushman FD, Costello EK, et al.  
545 QIIME allows analysis of high-throughput community sequencing data. *Nat Methods*.  
546 2011;7: 335–336. doi:10.1038/nmeth.f.303.QIIME
- 547 29. Guirro M, Herrero P, Costa A, Gual-Grau A, Ceretó-Massagué A, Hernández A, et al.  
548 Deciphering the functions of gut microbiota in an animal model of obesity using an  
549 optimized metaproteomics workflow . *J Proteome Res*. 2019;Submitted.
- 550 30. Lee S, Keirse KI, Kirkland R, Grunewald ZI, Fischer JG, de La Serre CB. Blueberry  
551 Supplementation Influences the Gut Microbiota, Inflammation, and Insulin Resistance in  
552 High-Fat-Diet-Fed Rats. *J Nutr. United States*; 2018;148: 209–219.  
553 doi:10.1093/jn/nxx027
- 554 31. Behr C, Kamp H, Fabian E, Krennrich G, Mellert W, Peter E, et al. Gut microbiome-  
555 related metabolic changes in plasma of antibiotic-treated rats. *Arch Toxicol. Springer*  
556 *Berlin Heidelberg*; 2017;91: 3439–3454. doi:10.1007/s00204-017-1949-2
- 557 32. Tulstrup MVL, Christensen EG, Carvalho V, Linninge C, Ahrné S, Højberg O, et al.  
558 Antibiotic Treatment Affects Intestinal Permeability and Gut Microbial Composition in  
559 Wistar Rats Dependent on Antibiotic Class. *PLoS One*. 2015;10: 1–17.  
560 doi:10.1371/journal.pone.0144854
- 561 33. Hoban AE, Moloney RD, Golubeva A V., McVey Neufeld KA, O’Sullivan O, Patterson  
562 E, et al. Behavioural and neurochemical consequences of chronic gut microbiota  
563 depletion during adulthood in the rat. *Neuroscience. IBRO*; 2016;339: 463–477.

- 564 doi:10.1016/j.neuroscience.2016.10.003
- 565 34. Lamendella R, Santo Domingo JW, Ghosh S, Martinson J, Oerther DB. Comparative  
566 fecal metagenomics unveils unique functional capacity of the swine gut. BMC  
567 Microbiol. BioMed Central Ltd; 2011;11: 103. doi:10.1186/1471-2180-11-103
- 568 35. Villamil SI, Huerlimann R, Morianos C, Sarnyai Z, Maes GE. Adverse effect of early-  
569 life high-fat/high-carbohydrate (“Western”) diet on bacterial community in the distal  
570 bowel of mice. Nutr Res. Elsevier Inc.; 2018;50: 25–36.  
571 doi:10.1016/j.nutres.2017.11.008
- 572 36. Zhang Y, Limaye PB, Renaud HJ, Klaassen CD. Effect of various antibiotics on  
573 modulation of intestinal microbiota and bile acid profile in mice. Toxicol Appl  
574 Pharmacol. Elsevier Inc.; 2014;277: 138–145. doi:10.1016/j.taap.2014.03.009
- 575 37. Verdú EF, Bercik P, Verma-Gandhu M, Huang XX, Blennerhassett P, Jackson W, et al.  
576 Specific probiotic therapy attenuates antibiotic induced visceral hypersensitivity in mice.  
577 Gut. 2006;55: 182–190. doi:10.1136/gut.2005.066100
- 578 38. Fröhlich EE, Farzi A, Mayerhofer R, Reichmann F, Jačan A, Wagner B, et al. Cognitive  
579 impairment by antibiotic-induced gut dysbiosis: Analysis of gut microbiota-brain  
580 communication. Brain Behav Immun. 2016;56: 140–155. doi:10.1016/j.bbi.2016.02.020
- 581 39. Matsunaga N, Shimizu H, Fujimoto K, Watanabe K, Yamasaki T, Hatano N, et al.  
582 Expression of glyceraldehyde-3-phosphate dehydrogenase on the surface of *Clostridium*  
583 *perfringens* cells. Anaerobe. England; 2018;51: 124–130.  
584 doi:10.1016/j.anaerobe.2018.05.001
- 585 40. Schreiber W, Durre P. The glyceraldehyde-3-phosphate dehydrogenase of *Clostridium*  
586 *acetobutylicum*: isolation and purification of the enzyme, and sequencing and  
587 localization of the gap gene within a cluster of other glycolytic genes. Microbiology.  
588 England; 1999;145 ( Pt 8: 1839–1847. doi:10.1099/13500872-145-8-1839
- 589 41. Oberbach A, Haange SB, Schlichting N, Heinrich M, Lehmann S, Till H, et al.  
590 Metabolic in Vivo Labeling Highlights Differences of Metabolically Active Microbes  
591 from the Mucosal Gastrointestinal Microbiome between High-Fat and Normal Chow

- 592 Diet. *J Proteome Res.* 2017;16: 1593–1604. doi:10.1021/acs.jproteome.6b00973
- 593 42. Heinritz SN, Weiss E, Eklund M, Aumiller T, Louis S, Rings A, et al. Intestinal  
594 microbiota and microbial metabolites are changed in a pig model fed a high-fat/low-fiber  
595 or a low-fat/high-fiber diet. *PLoS One.* 2016;11: 1–21.  
596 doi:10.1371/journal.pone.0154329
- 597
- 598

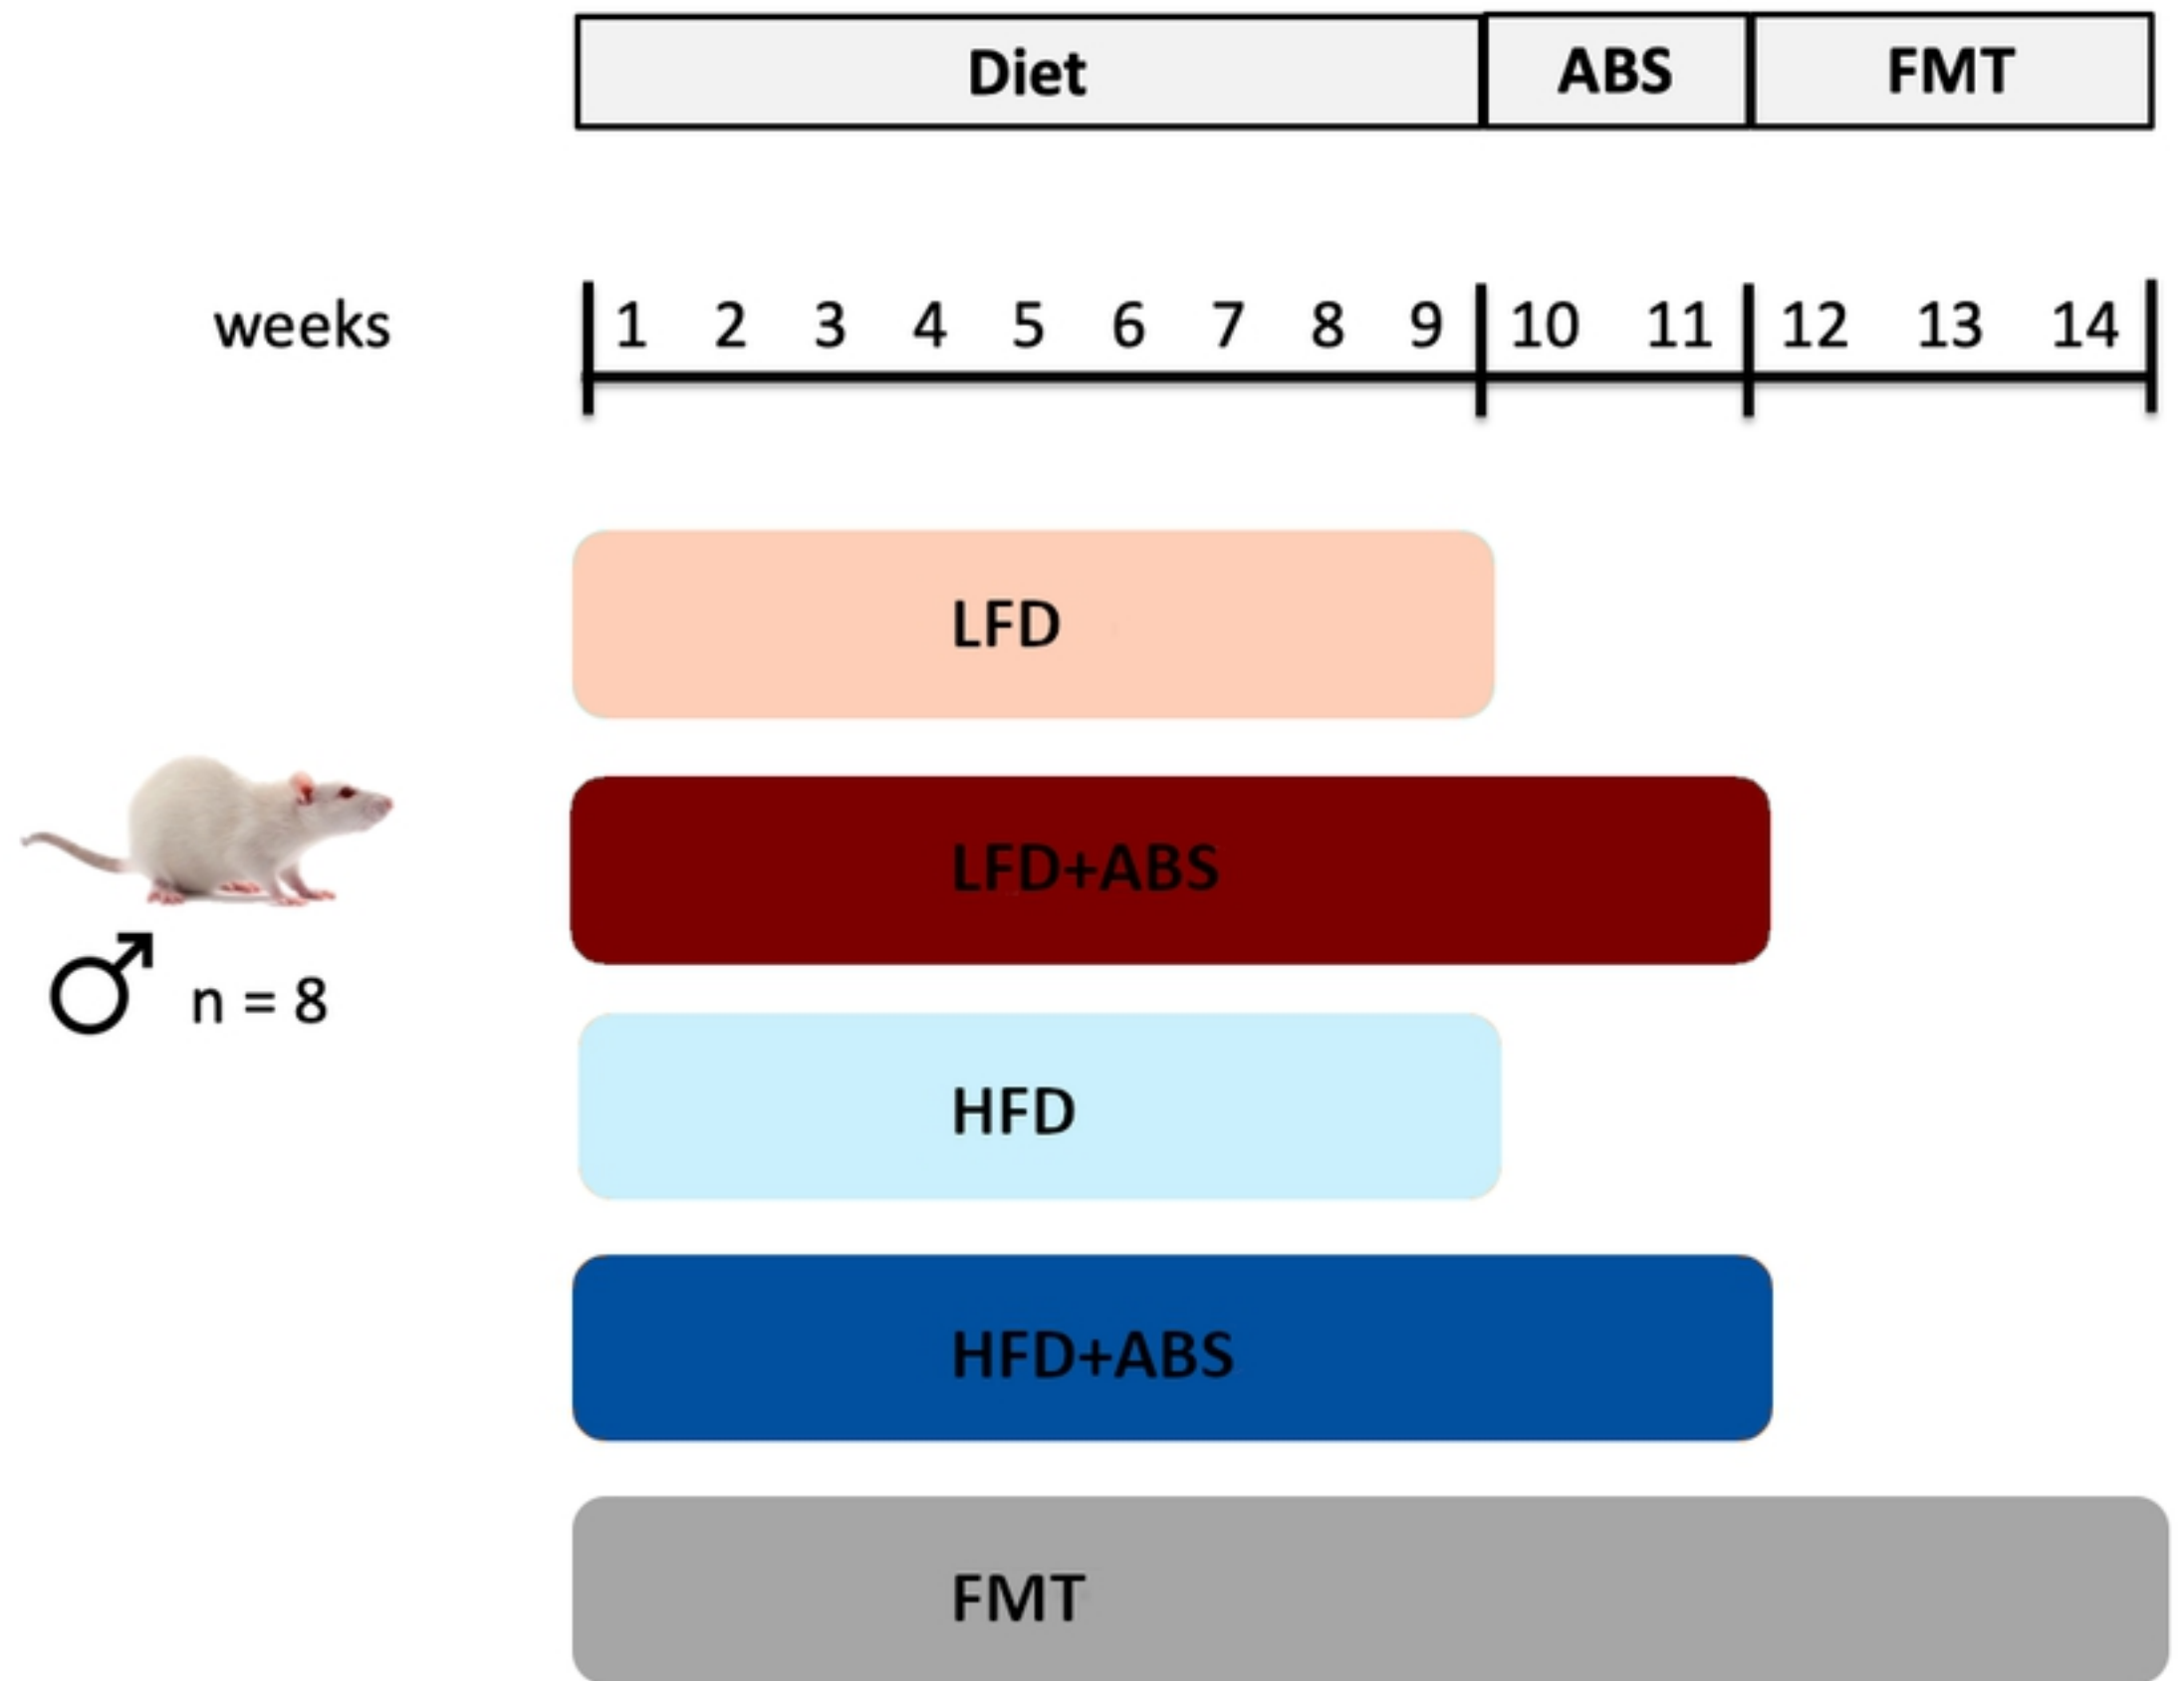

Figure 1

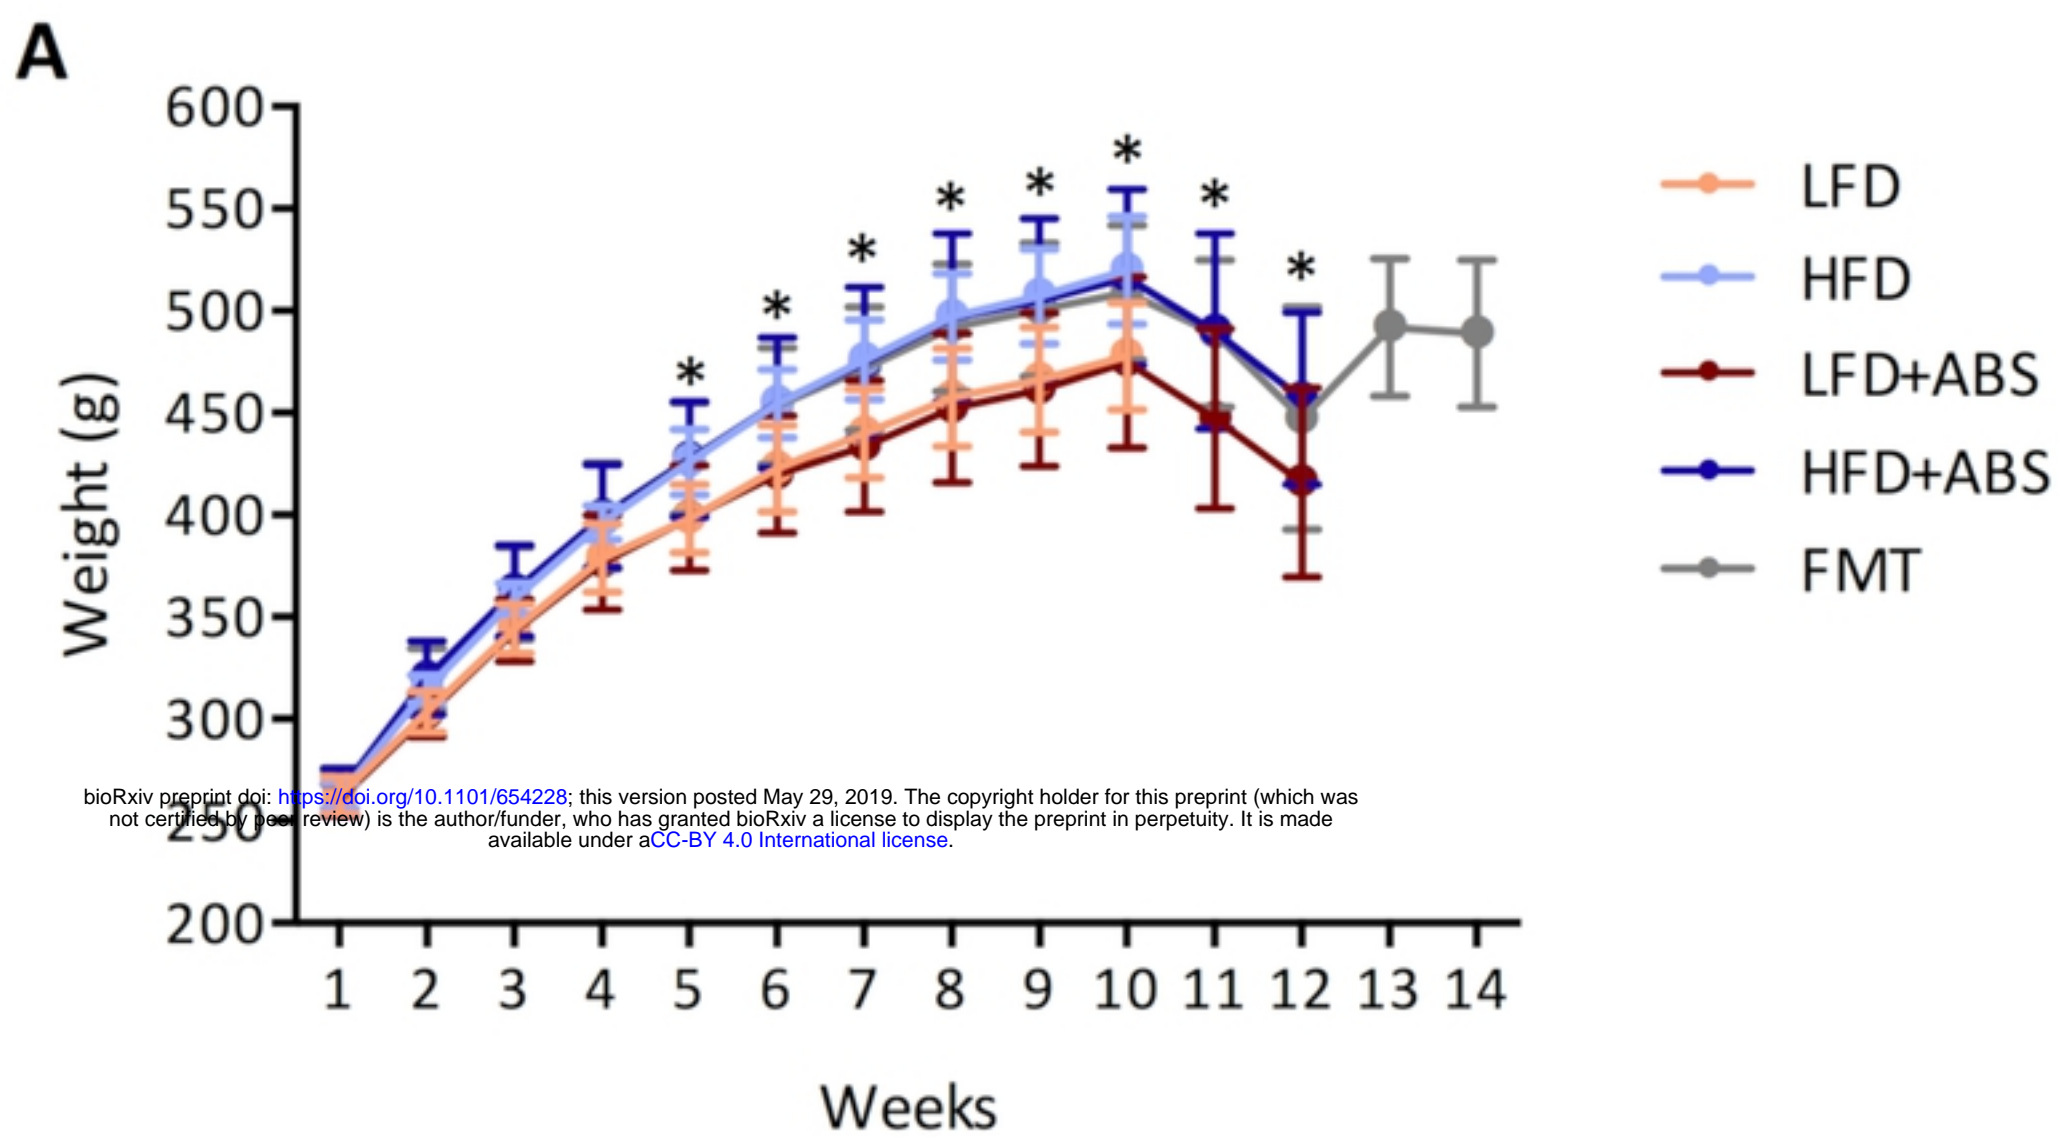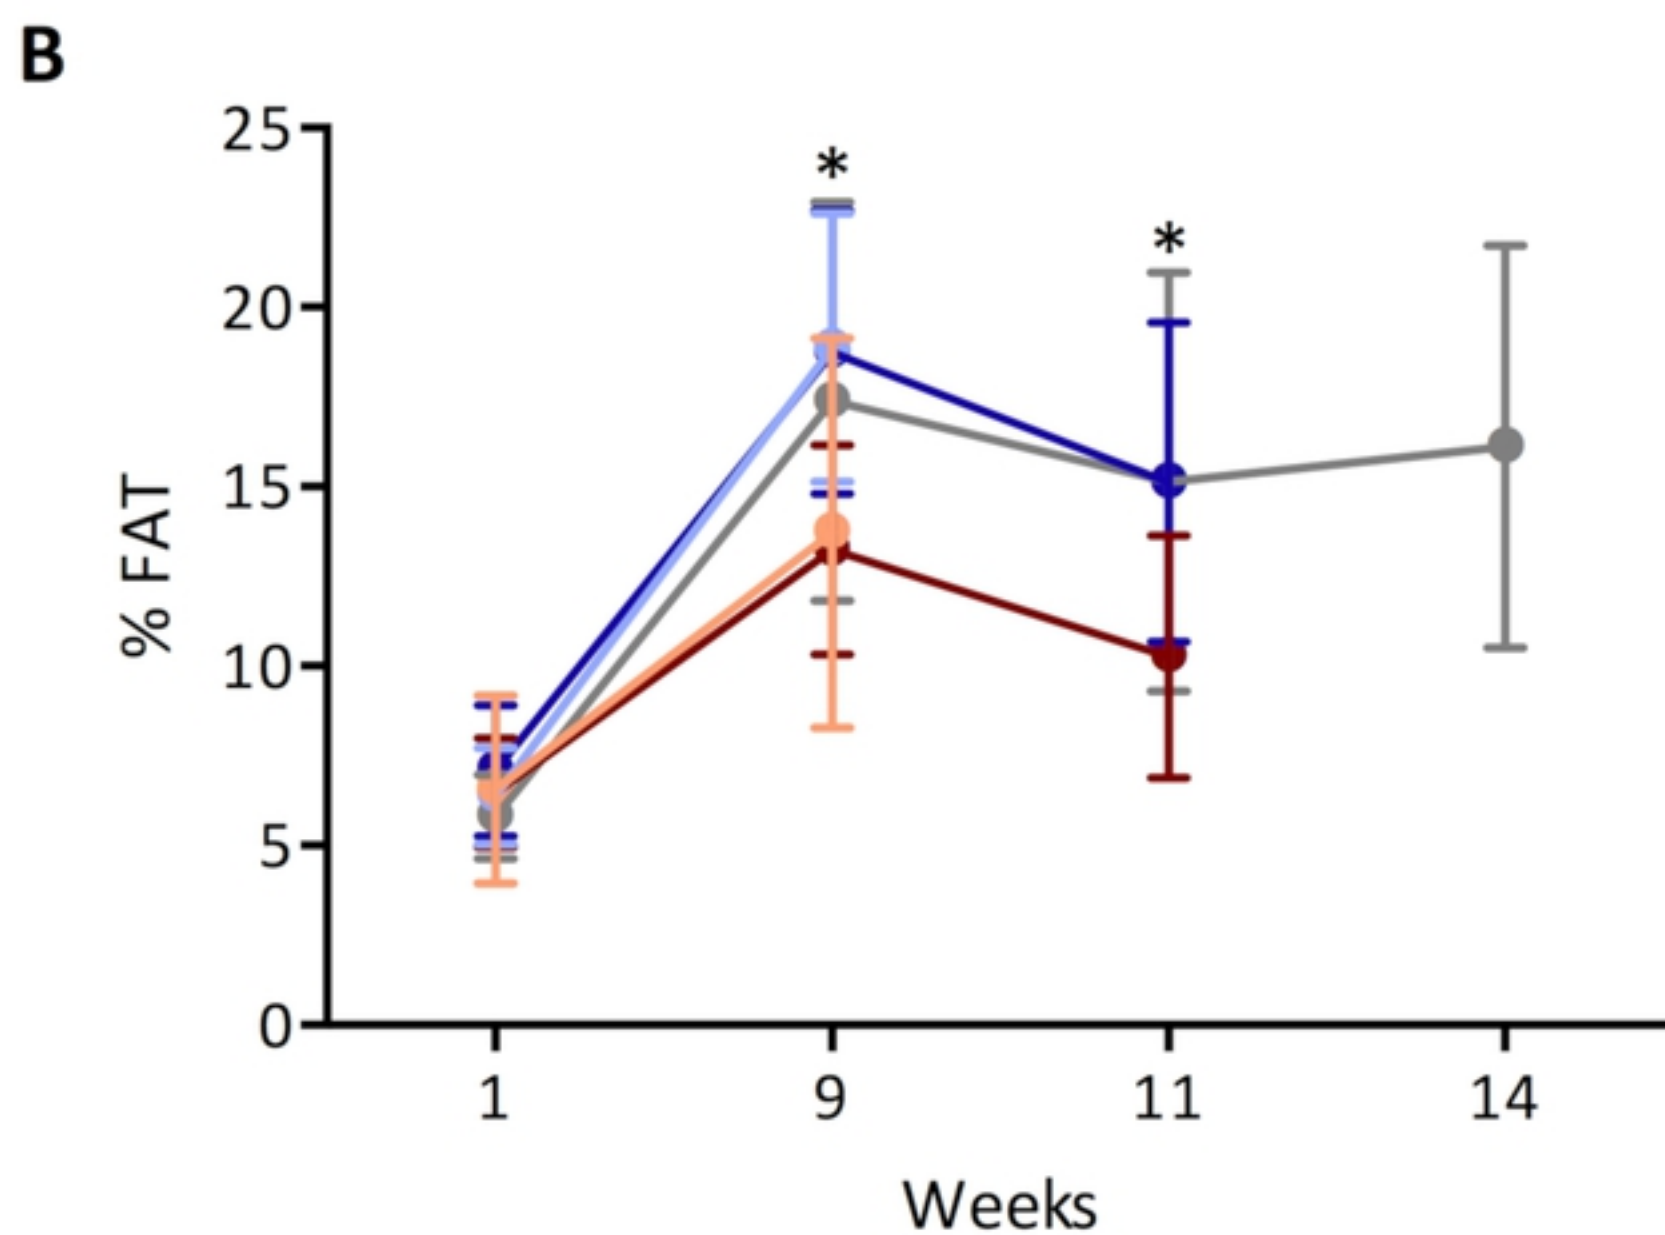

Figure 2

### METAGENOMICS

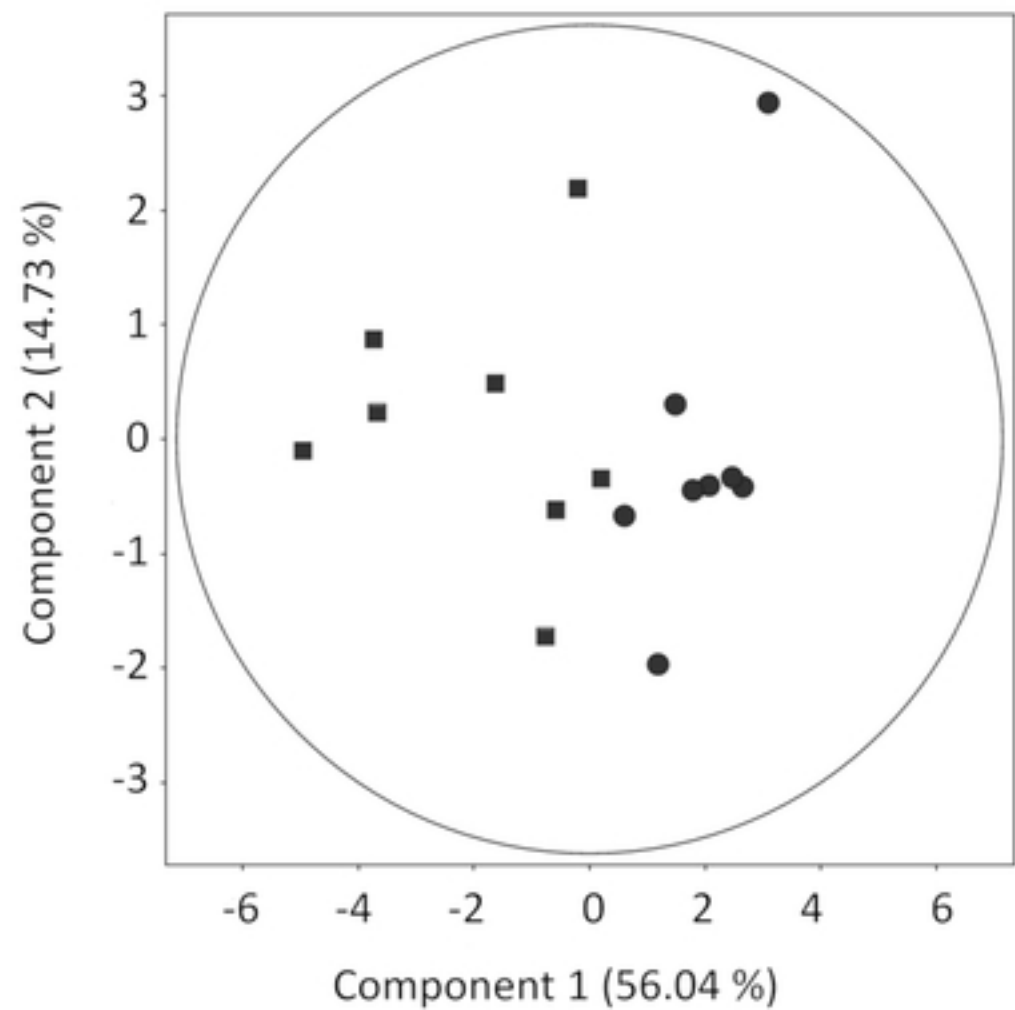

### METAPROTEOMICS

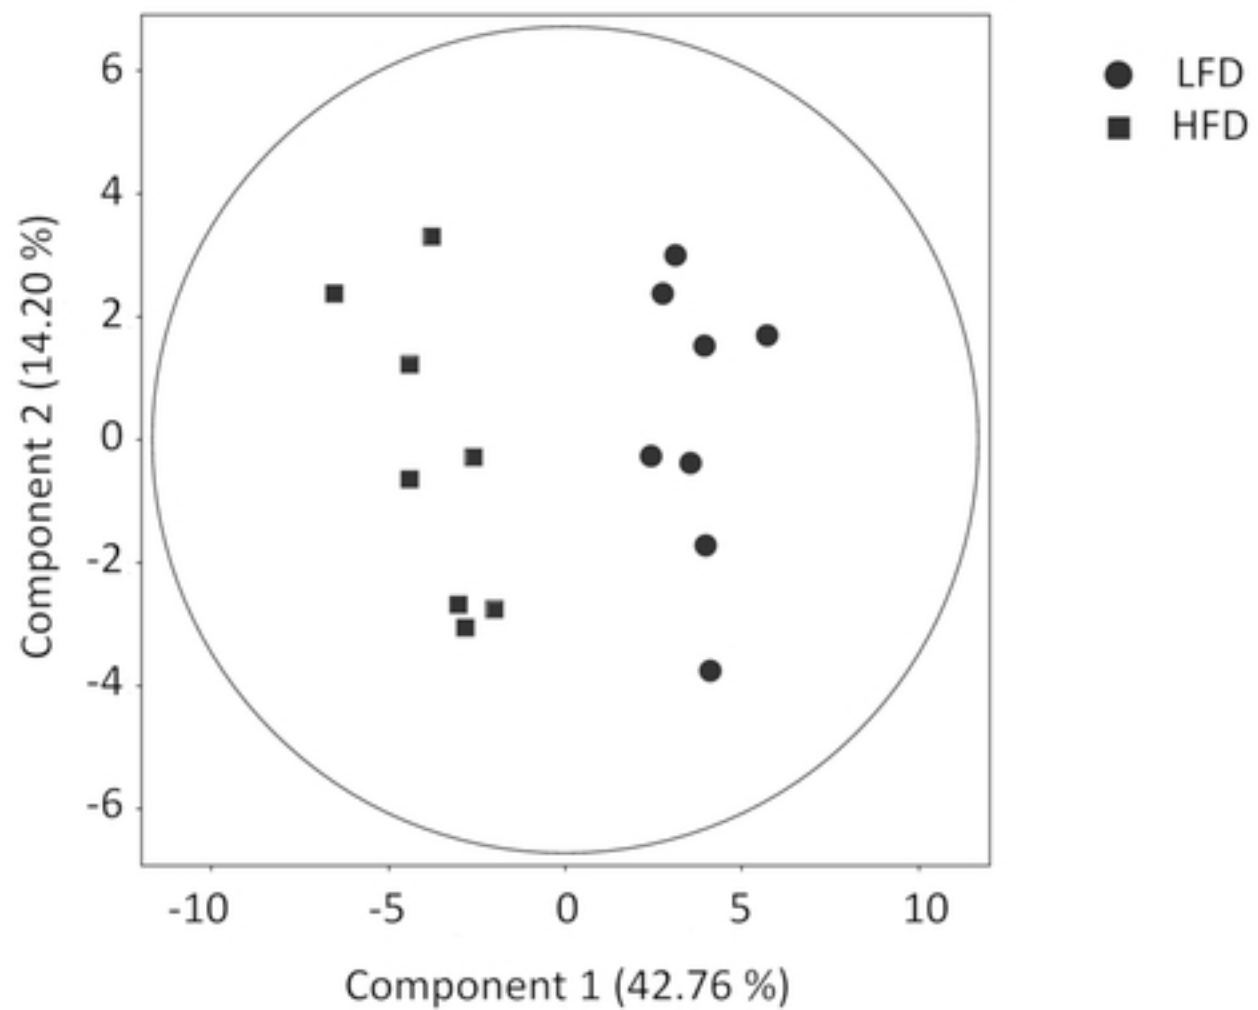

Figure 3

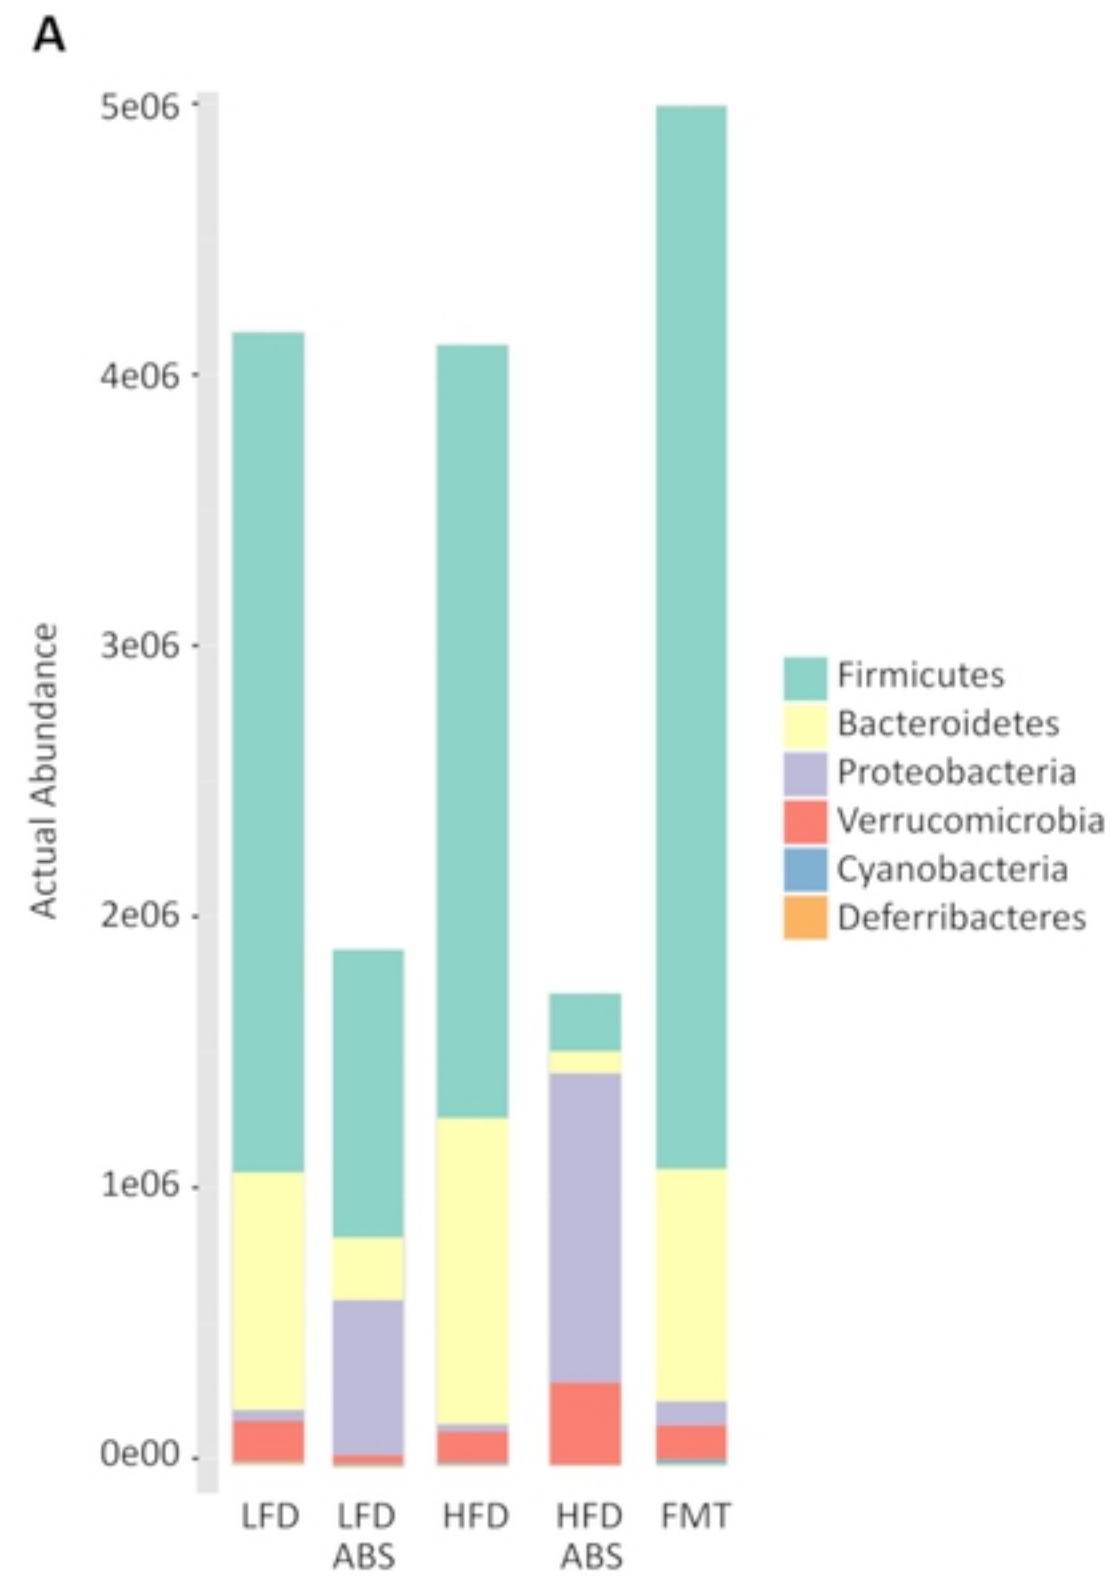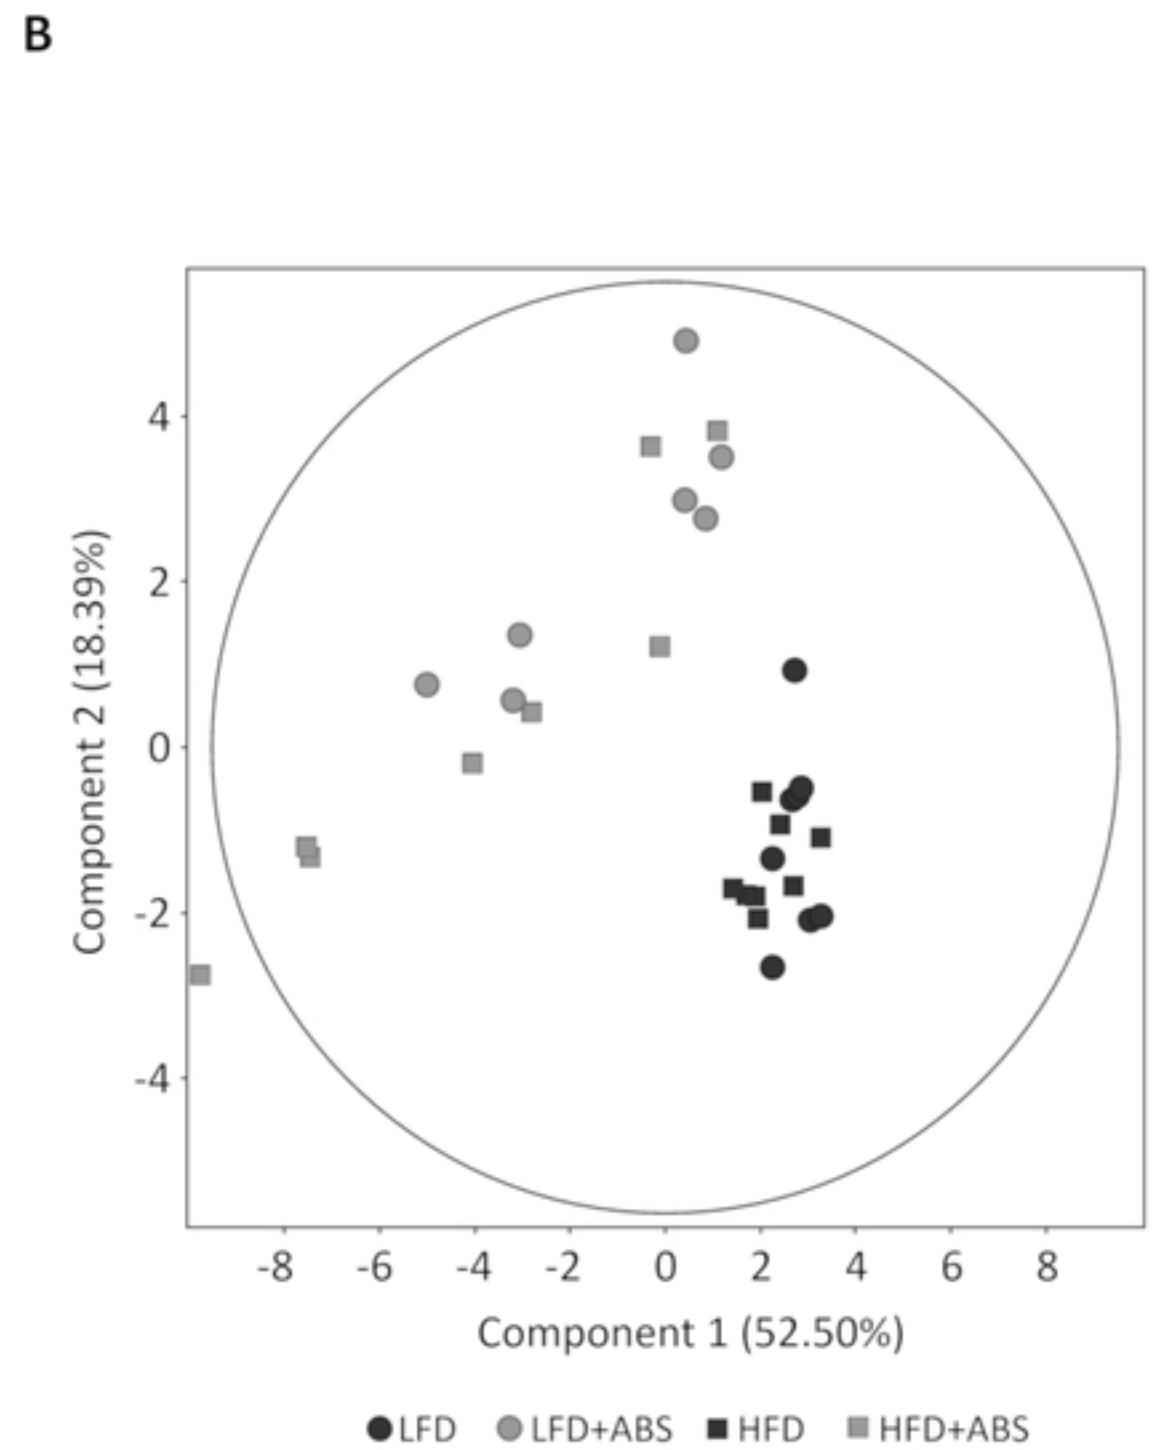

Figure 4



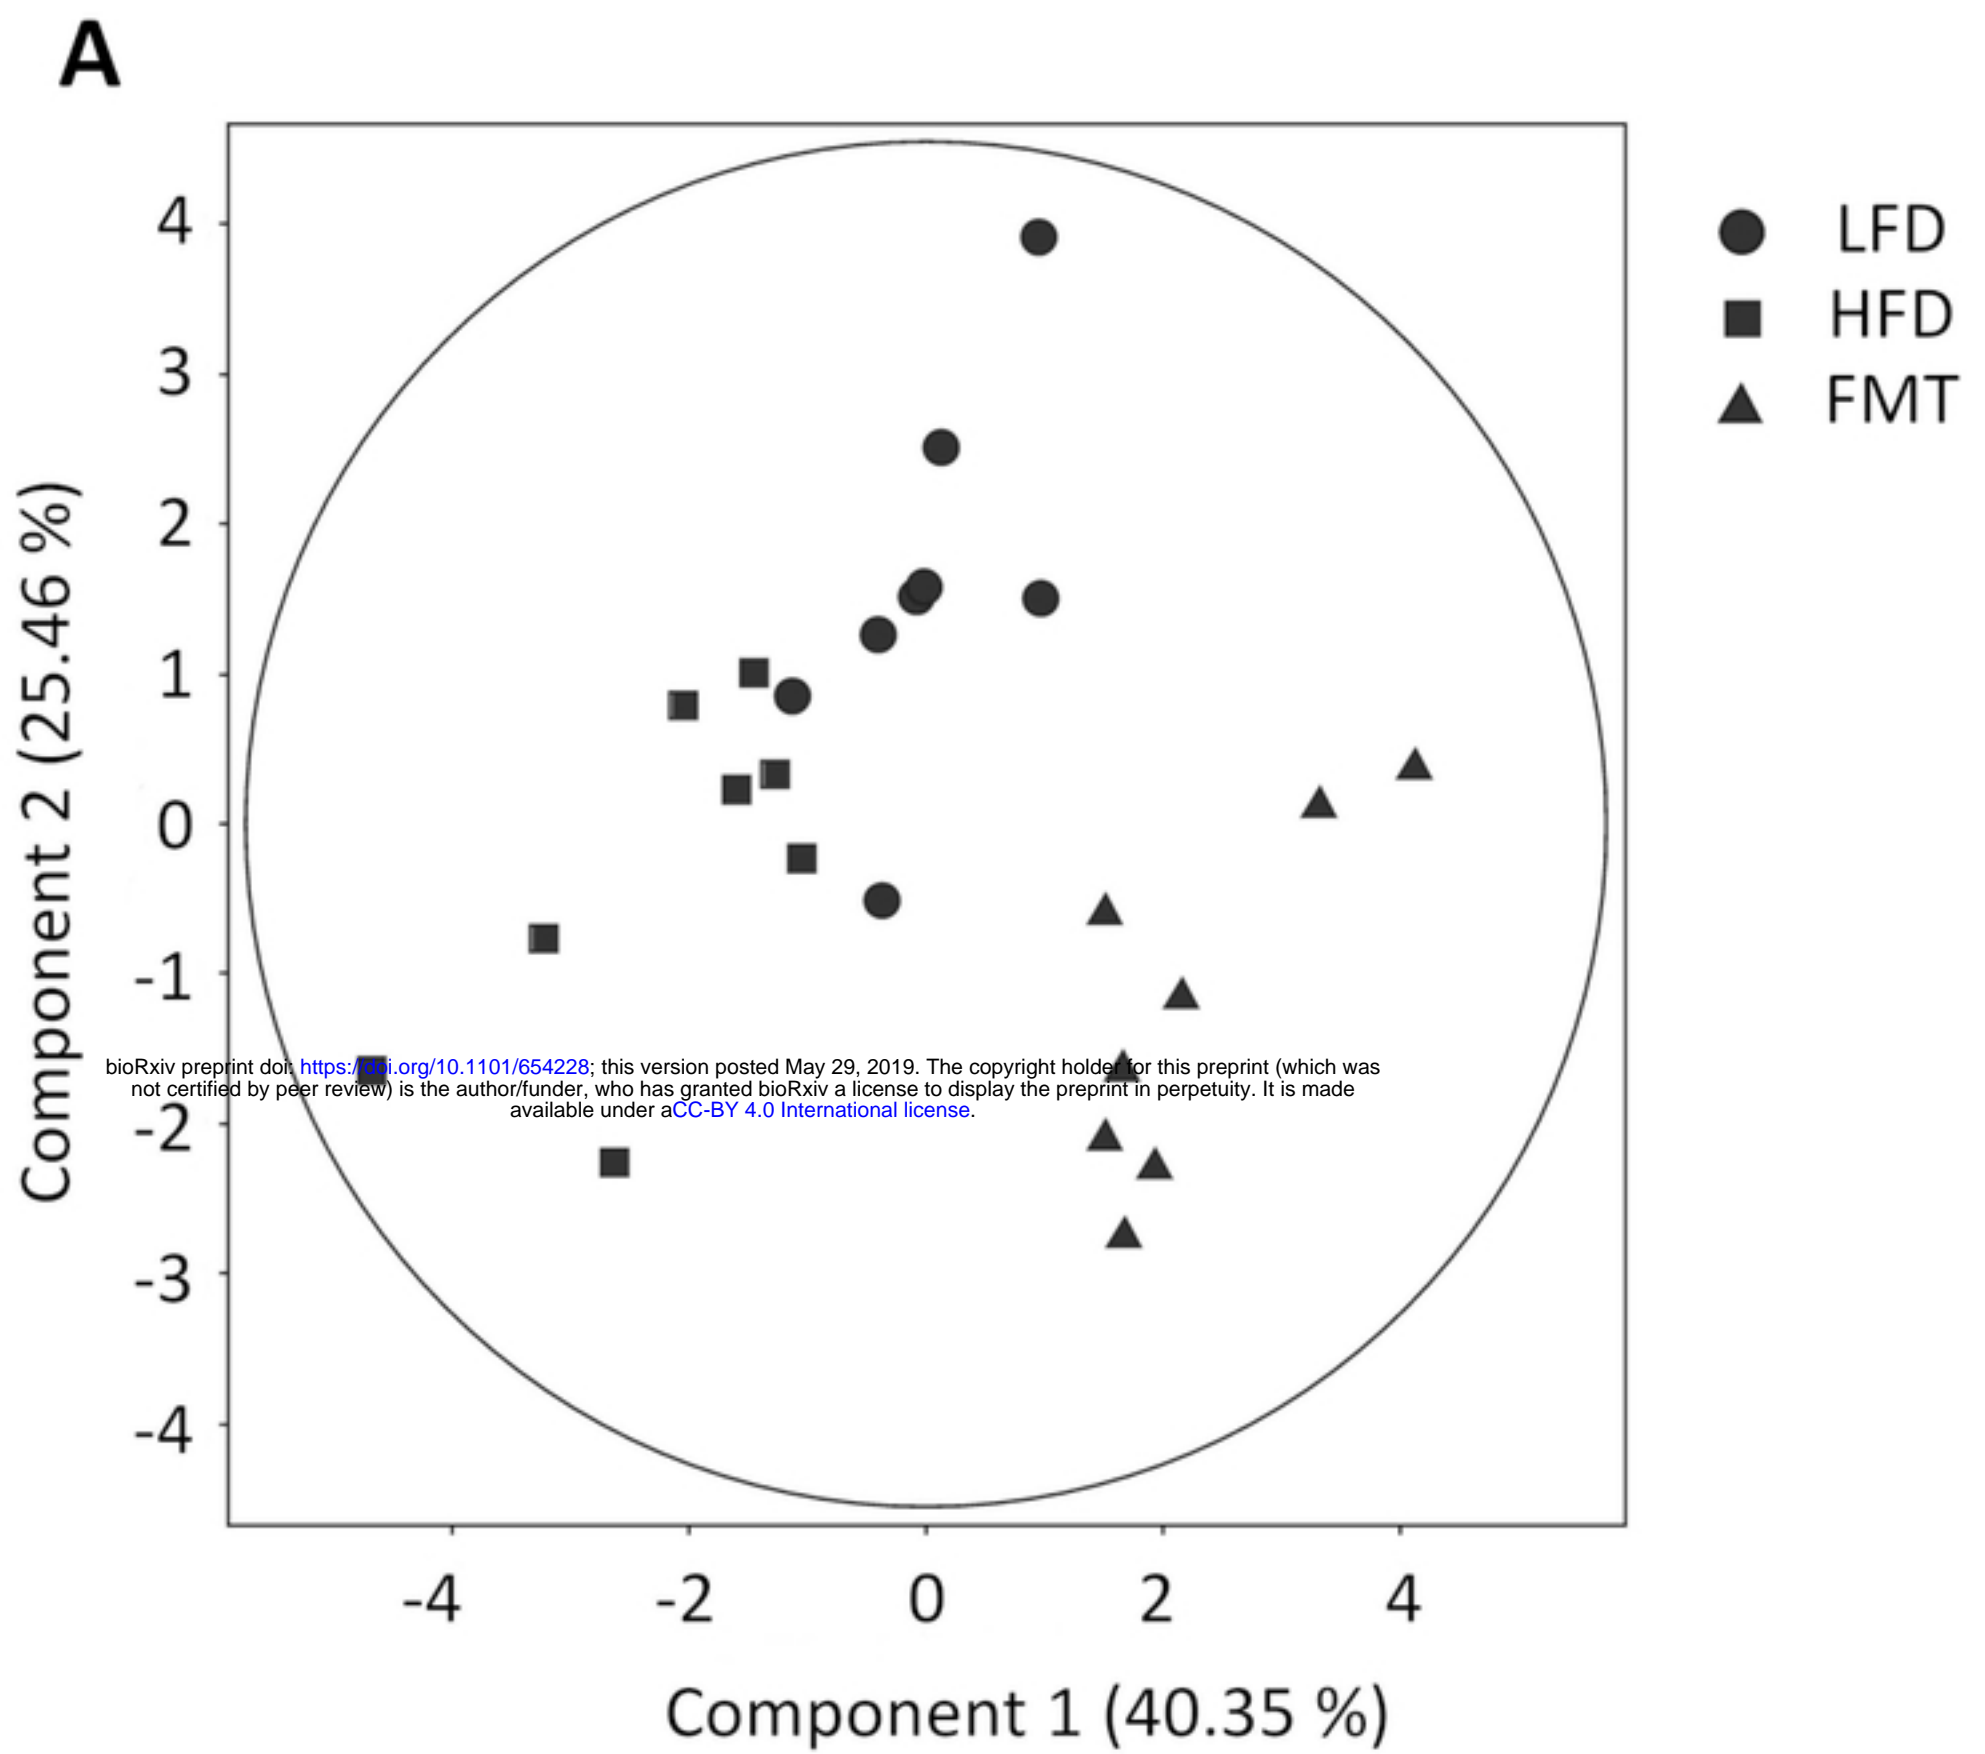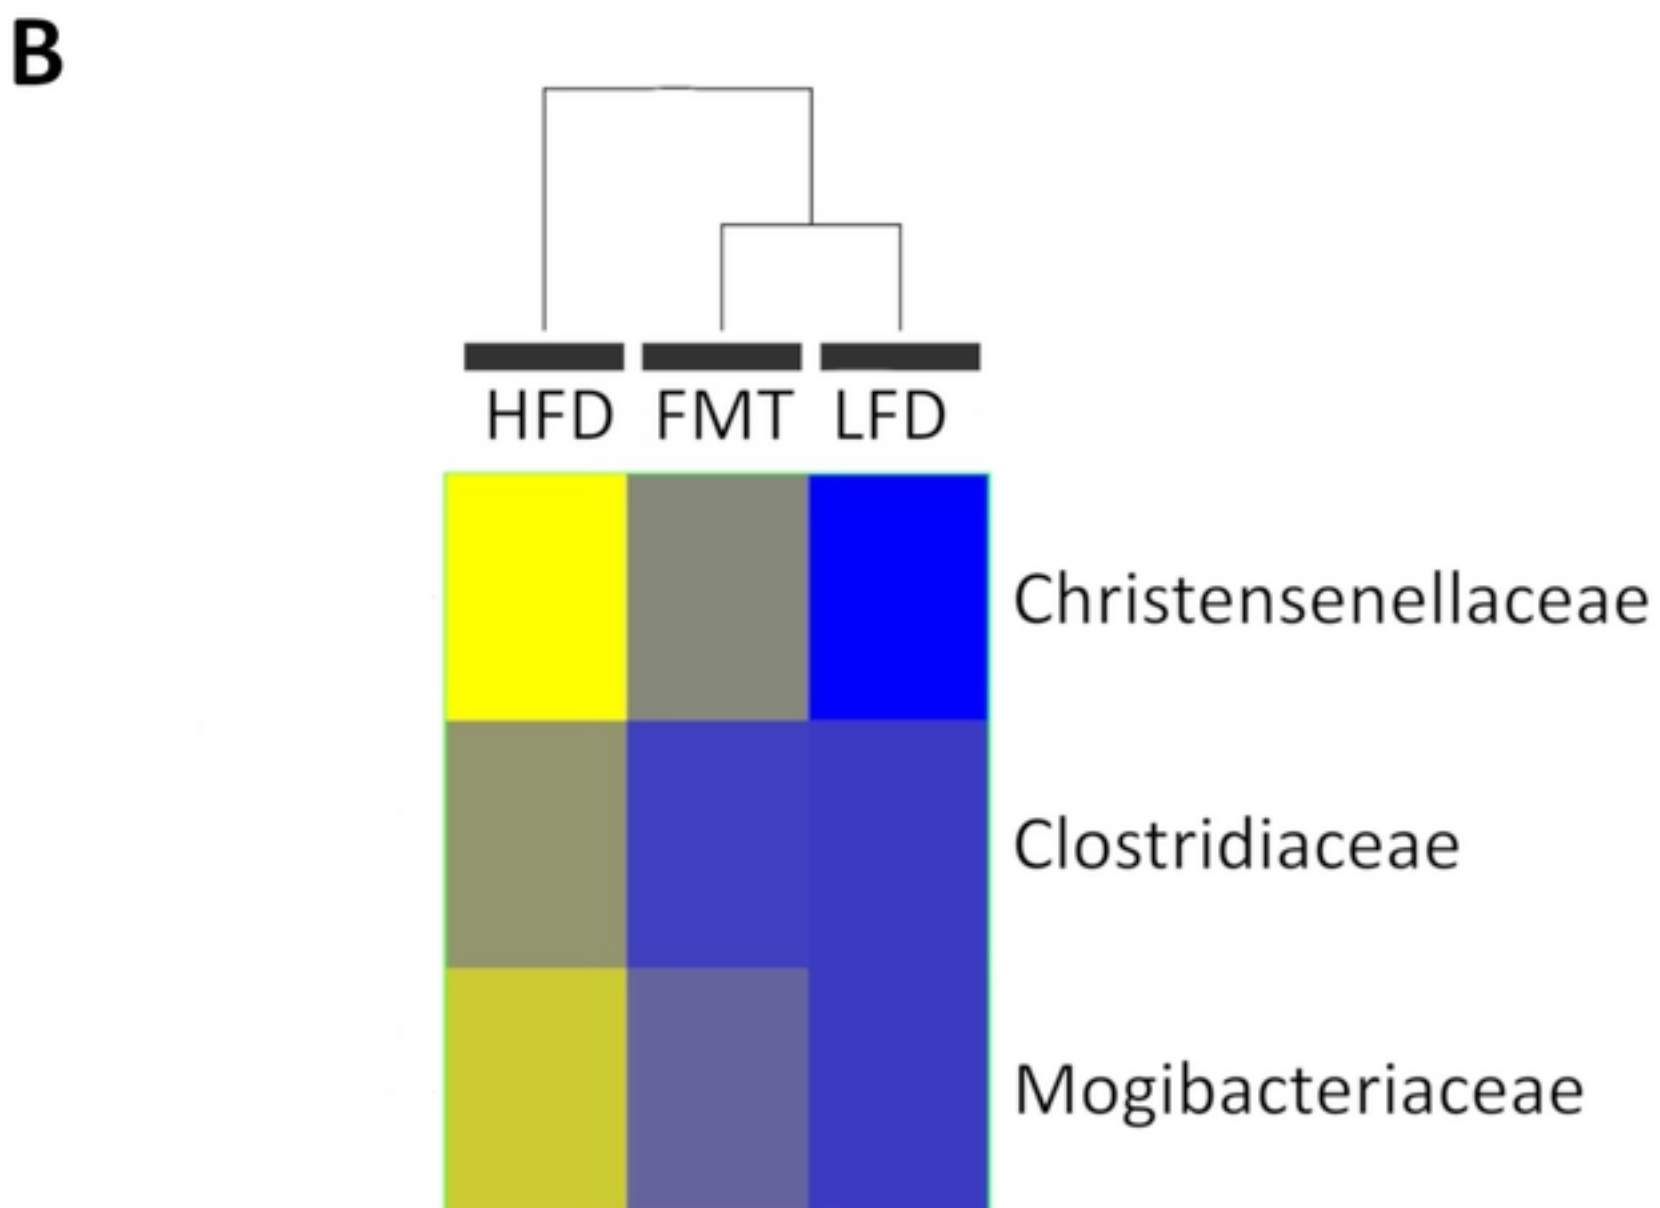

Figure 5

A

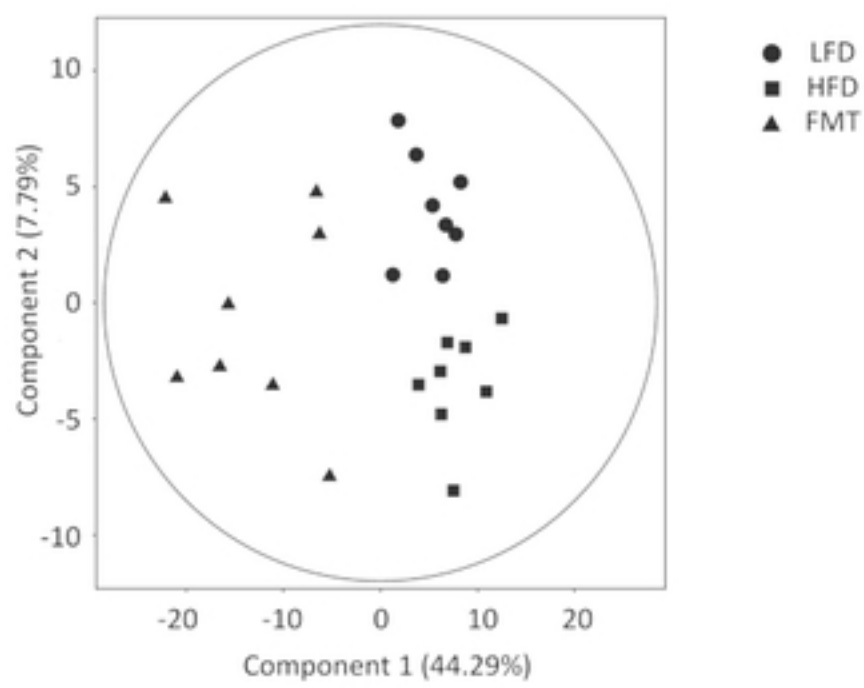

B

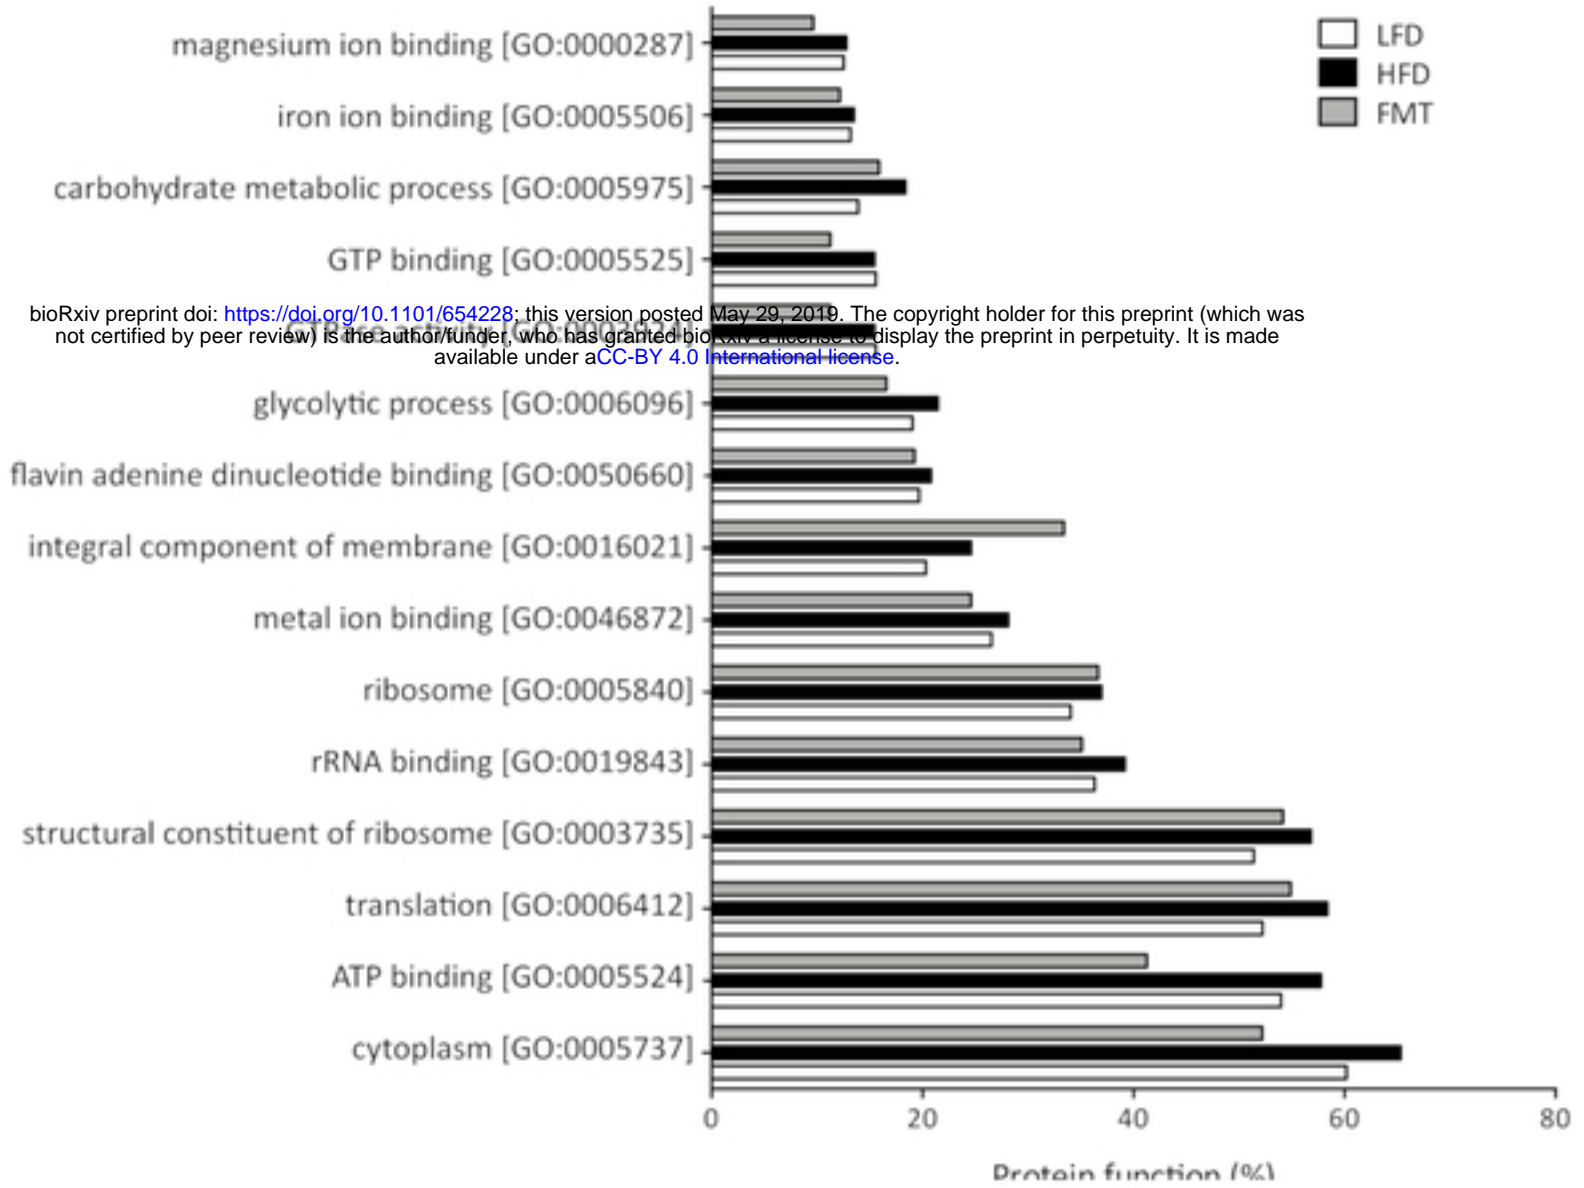

C

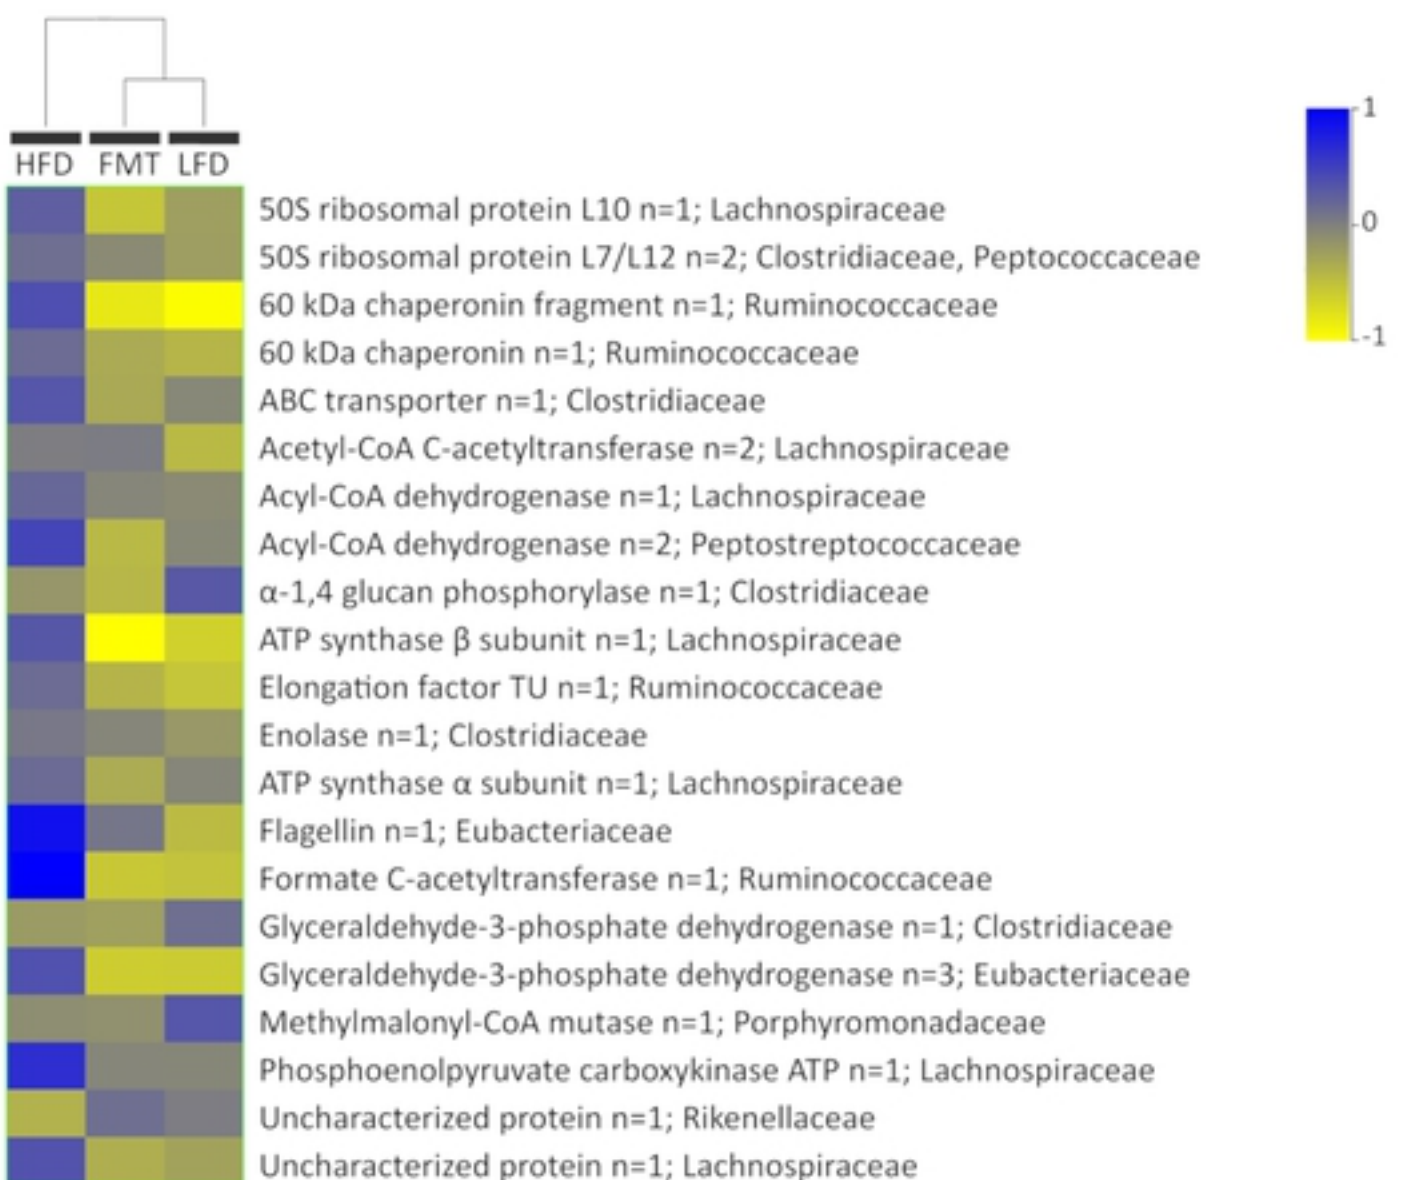

Figure 6

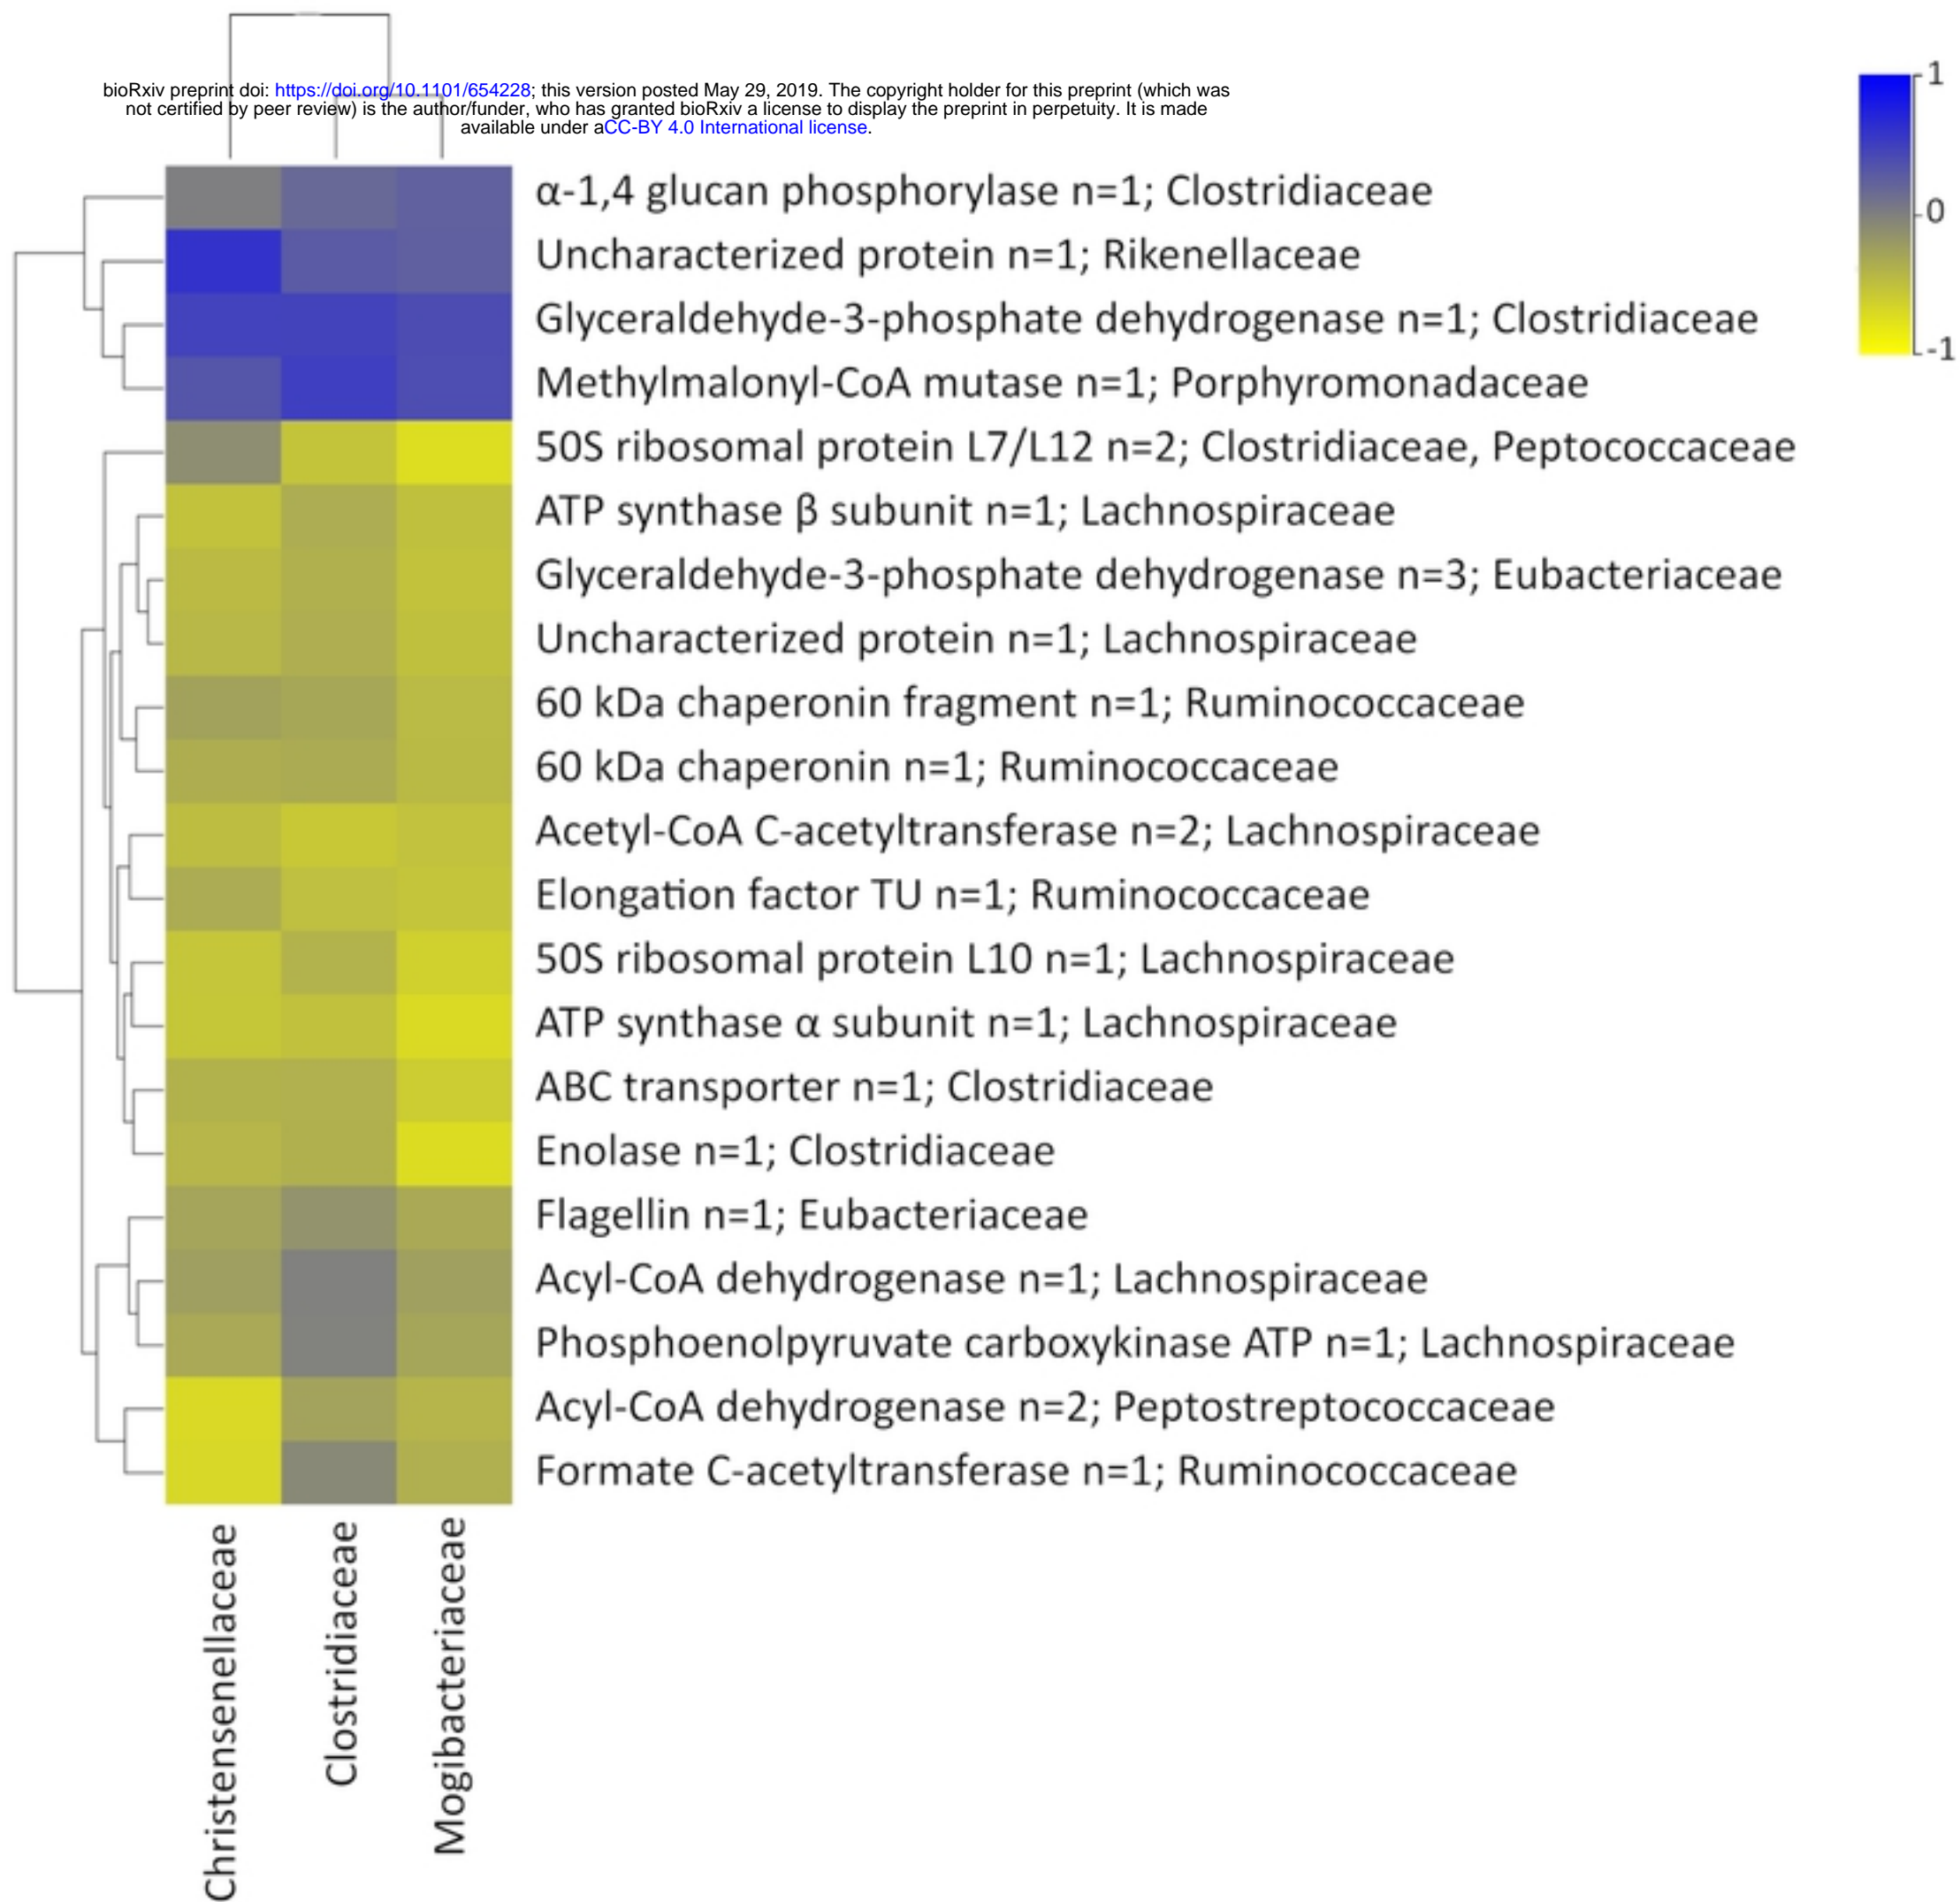

Figure 7
